# Supplementary material for: Narrative review of occupational exposures and noncommunicable diseases
Source: PubMed Central journal article supplement — Ann Work Expo Health. 2024 May 30;68(6):562–80. doi: 10.1093/annweh/wxae045 (PMC11229329; doi:10.1093/annweh/wxae045), 2024-05-30
Supplement: wxae045_suppl_supplementary_tables_1-6.pdf [file wxae045_suppl_supplementary_tables_1-6.pdf]

Supplemental material for:

## Narrative review of occupational exposures and non-communicable diseases

Susan Peters<sup>1</sup>, Karina Undem<sup>2</sup>, Svetlana Solovieva<sup>3</sup>, Jenny Selander<sup>4</sup>, Vivi Schlunssen<sup>5</sup>, Karen M Oude Hengel<sup>6</sup>, Maria Albin<sup>4</sup>, Calvin B Ge<sup>6</sup>, Katarina Kjellberg<sup>4,7</sup>, Damien M. McElvenny<sup>8,9</sup>, Per Gustavsson<sup>4</sup>, Henrik A Kolstad<sup>10</sup>, Anne Mette L Würtz<sup>5</sup>, Bendik C. Brinchmann<sup>2</sup>, Karin Broberg<sup>4</sup>, Stine Fossum<sup>2</sup>, Merete Bugge<sup>2</sup>, Mette Wulf Christensen<sup>10</sup>, Manosij Ghosh<sup>11</sup>, David Høyrup Christiansen<sup>12</sup>, Suzanne L. Merkus<sup>2</sup>, Lars-Kristian Lunde<sup>2</sup>, Eira Viikari-Juntura<sup>3</sup>, Annett Dalbøge<sup>10</sup>, Daniel Falkstedt<sup>4</sup>, Morten Vejs Willert<sup>10</sup>, Anke Huss<sup>1</sup>, Else Toft Würtz<sup>10</sup>, Orianne Dumas<sup>13</sup>, Inge Brosbøl Iversen<sup>10</sup>, Mimmi Leite<sup>2</sup>, Christine Cramer<sup>5,10</sup>, Jorunn Kirkeleit<sup>2,14</sup>, Cecilie Svanes<sup>14,15</sup>, Håkan Tinnerberg<sup>4,16</sup>, Judith Garcia-Aymerich<sup>17,18,19</sup>, Anne Vested<sup>5</sup>, Pernilla Wiebert<sup>4,7</sup>, Karl-Christian Nordby<sup>2</sup>, Lode Godderis<sup>11</sup>, Roel Vermeulen<sup>1</sup>, Anjoeka Pronk<sup>6</sup>, Ingrid Sivesind Mehlum<sup>2,20,21,22</sup>

1. Institute for Risk Assessment Sciences, Utrecht University, Utrecht, the Netherlands
2. The National Institute of Occupational Health (STAMI), Norway
3. Finnish Institute of Occupational Health, Finland
4. Institute of Environmental Medicine, Karolinska Institutet, Sweden.
5. Department of Public Health, Research Unit for Environment, Occupation and Health, Danish Ramazzini Centre, Aarhus University, Aarhus, Denmark
6. Netherlands Organisation for Applied Scientific Research TNO, the Netherlands
7. Centre for Occupational and Environmental Medicine, Region Stockholm, Stockholm, Sweden
8. Institute of Occupational Medicine, Edinburgh, UK
9. Centre for Occupational and Environmental Health, University of Manchester, Manchester, UK
10. Department of Occupational Medicine, Danish Ramazzini Centre, Aarhus University Hospital, Aarhus, Denmark
11. Department of Public Health and Primary Care, Centre for Environment & Health, KU Leuven, Leuven, Belgium
12. Centre of Elective surgery, Regionhospital Silkeborg, Department of Clinical Medicine, Aarhus University, Denmark
13. Université Paris-Saclay, UVSQ, Univ. Paris-Sud, Inserm, Équipe d'Épidémiologie respiratoire intégrative, CESP, 94807, Villejuif, France
14. Centre for International Health, Department of Global Public Health and Primary Care, University of Bergen, Bergen, Norway
15. Department of Occupational Medicine, Haukeland University Hospital, Bergen, Norway
16. School of Public Health and Community Medicine, Gothenburg University, Gothenburg, Sweden
17. Barcelona Institute for Global Health (ISGlobal), Barcelona, Spain
18. Universitat Pompeu Fabra (UPF), Barcelona, Spain
19. CIBER Epidemiología y Salud Pública (CIBERESP), Madrid, Spain
20. Institute of Health and Society, University of Oslo, Oslo, Norway
21. Department of Occupational and Environmental Medicine, Bispebjerg and Frederiksberg Hospitals, Copenhagen, Denmark
22. Department of Public Health, University of Copenhagen, Copenhagen, Denmark

**Supplemental Table 1.** Occupational risk factors for cancer in humans (adapted from Loomis et al.<sup>1</sup> (Group 1 agents), Marant Micallef et al.<sup>2</sup> (Group 1 and 2A agents), and IARC monographs published subsequently (<https://monographs.iarc.who.int/monographs-available/>).

| <b>Cancer</b>   | <b>Exposure Group</b>               | <b>Consistent evidence for association</b>                                                                                                                               | <b>Limited or inadequate evidence for association</b>                                                                                                                                                                                                                                           |
|-----------------|-------------------------------------|--------------------------------------------------------------------------------------------------------------------------------------------------------------------------|-------------------------------------------------------------------------------------------------------------------------------------------------------------------------------------------------------------------------------------------------------------------------------------------------|
| Lung            | Airborne particles/complex mixtures | Asbestos (all forms)<br>Engine exhaust, diesel<br>Silica dust, crystalline, in the form of quartz or cristobalite<br>Soot<br>Welding fumes                               |                                                                                                                                                                                                                                                                                                 |
|                 | Chemicals and chemical mixtures     | Bis(chloromethyl)ether, chloromethyl methyl ether (technical grade)<br>PAHs (aluminium production, coal gasification, coal-tar pitch, coke production)<br>Sulfur mustard | Alpha-Chlorinated toluenes and benzoyl chloride (combined exposures)<br>Benzene<br>Bitumens<br>Diazinon<br>Hydrazine<br>Insecticides (non-arsenical, occupational exposures in spraying and application)<br>Mists from strong inorganic acids<br>PAHs (carbon electrode manufacture, creosotes) |
|                 | Metals and metal compounds          | Arsenic and inorganic arsenic compounds<br>Beryllium and its compounds<br>Cadmium and its compounds<br>Chromium (VI) compounds<br>Nickel compounds                       | Trivalent antimony                                                                                                                                                                                                                                                                              |
|                 | Radiation and radionuclides         | Hematite mining (underground, with exposure to radon)<br>Plutonium<br>Radon-222 and its decay products<br>X-radiation and gamma-radiation                                |                                                                                                                                                                                                                                                                                                 |
|                 | Occupation, industry or process     | Acheson process<br>Iron and steel founding<br>Painter<br>Rubber manufacturing                                                                                            | Art glass manufacturing                                                                                                                                                                                                                                                                         |
| Urinary bladder | Airborne particles/complex mixtures |                                                                                                                                                                          | Engine exhaust, diesel                                                                                                                                                                                                                                                                          |
|                 | Chemicals and chemical mixtures     | Aromatic amines (2-Naphthylamine, 4-aminobiphenyl, auramine production, benzidine, magenta production, ortho-toluidine)<br>PAHs (aluminium production)                   | 2-mercaptobenzothiazole<br>Aromatic amine (4-chloro-ortho-toluidine)<br>PAHs (coal tar pitch)<br>Soot<br>Tetrachloroethylene                                                                                                                                                                    |

|                                                   |                                     |                                                                                                        |                                                                                                                                                                        |
|---------------------------------------------------|-------------------------------------|--------------------------------------------------------------------------------------------------------|------------------------------------------------------------------------------------------------------------------------------------------------------------------------|
|                                                   | Metals and metal compounds          | Arsenic and inorganic arsenic compounds                                                                |                                                                                                                                                                        |
|                                                   | Radiation and radionuclides         | X-radiation and gamma-radiation                                                                        |                                                                                                                                                                        |
|                                                   | Occupation, industry or process     | Firefighter<br>Painter<br>Rubber manufacturing                                                         | Hairdressers and barbers                                                                                                                                               |
| Skin (incl. malignant melanoma)                   | Airborne particles/complex mixtures | Soot                                                                                                   |                                                                                                                                                                        |
|                                                   | Chemicals and chemical mixtures     | Coal-tar pitch<br>Mineral oils, untreated or treated mildly<br>Polychlorinated biphenyls<br>Shale oils | PAHs (creosotes)                                                                                                                                                       |
|                                                   | Metals and metal compounds          | Arsenic and inorganic arsenic compounds                                                                |                                                                                                                                                                        |
|                                                   | Radiation and radionuclides         | Solar radiation<br>Ultraviolet radiation<br>X-radiation and gamma-radiation                            |                                                                                                                                                                        |
|                                                   | Occupation, industry or process     | Coal-tar distillation                                                                                  | Firefighter<br>Petroleum refining                                                                                                                                      |
| Haematolymphatic system, including leukaemia, NHL | Chemicals and chemical mixtures     | 1,3-Butadiene<br>Benzene<br>Formaldehyde<br>Lindane<br>Pentachlorophenol                               | Diazinon<br>Dichloromethane (methylene chloride);<br>DDT<br>Ethylene oxide<br>Glyphosate<br>Malathion<br>PCBs<br>Styrene<br>Trichloroethylene<br>1,1,1-Trichloroethane |
|                                                   | Radiation and radionuclides         | X-radiation and gamma-radiation                                                                        | Radioiodines, including iodine-131<br>Radon-222                                                                                                                        |
|                                                   | Occupation, industry or process     | Rubber manufacturing                                                                                   | Firefighter                                                                                                                                                            |
| Nasal cavity and paranasal sinus                  | Airborne particles/complex mixtures | Leather dust<br>Wood dust                                                                              |                                                                                                                                                                        |
|                                                   | Chemicals and chemical mixtures     |                                                                                                        | Formaldehyde                                                                                                                                                           |

|              |                                     |                                                                                                |                                                                       |
|--------------|-------------------------------------|------------------------------------------------------------------------------------------------|-----------------------------------------------------------------------|
|              | Metals and metal compounds          | Nickel compounds                                                                               | Chromium (VI) compounds                                               |
|              | Radiation and radionuclides         | Radium-226, -228 and its decay products                                                        |                                                                       |
|              | Occupation, industry or process     | Isopropyl alcohol manufacture using strong acids                                               |                                                                       |
| Bone         | Radiation and radionuclides         | Plutonium<br>Radium-224, -226, -228 and its decay products;<br>X-radiation and gamma-radiation | Radioiodines, including iodine-131                                    |
| Larynx       | Airborne particles/complex mixtures | Acid mists<br>Asbestos (all forms)                                                             |                                                                       |
|              | Occupation, industry or process     |                                                                                                | Rubber manufacturing industry                                         |
| Oesophagus   | Radiation and radionuclides         | X-radiation and gamma-radiation                                                                |                                                                       |
|              | Occupation, industry or process     |                                                                                                | Rubber manufacturing industry                                         |
| Kidney       | Airborne particles/complex mixtures |                                                                                                | Welding fumes                                                         |
|              | Chemicals and chemical mixtures     | Trichloroethylene<br>Perfluorooctanoic acid (PFOA)                                             |                                                                       |
|              | Metals and metal compounds          |                                                                                                | Arsenic and inorganic arsenic compounds;<br>Cadmium and its compounds |
|              | Radiation and radionuclides         | X-radiation and gamma-radiation                                                                |                                                                       |
| Liver        | Chemicals and chemical mixtures     | Vinyl chloride                                                                                 | Dichloromethane (methylene chloride)<br>DDT<br>Trichloroethylene      |
|              | Metals and metal compounds          |                                                                                                | Arsenic and inorganic arsenic compounds                               |
|              | Radiation and radionuclides         | Plutonium                                                                                      | X-radiation and gamma-radiation                                       |
| Mesothelioma | Airborne particles/complex mixtures | Asbestos (all forms)                                                                           |                                                                       |
|              | Occupation, industry or process     | Firefighter<br>Painter                                                                         |                                                                       |
| Nasopharynx  | Airborne particles/complex mixtures | Wood dust                                                                                      | Asbestos (all forms)                                                  |

|                                  |                                     |                                                                       |                                                         |
|----------------------------------|-------------------------------------|-----------------------------------------------------------------------|---------------------------------------------------------|
|                                  | Chemicals and chemical mixtures     | Formaldehyde                                                          |                                                         |
| Stomach                          | Airborne particles/complex mixtures |                                                                       | Asbestos (all forms)                                    |
|                                  | Metals and metal compounds          |                                                                       | Lead compounds, inorganic                               |
|                                  | Radiation and radionuclides         | X-radiation and gamma-radiation                                       |                                                         |
|                                  | Occupation, industry or process     | Rubber manufacturing                                                  |                                                         |
| Thyroid                          | Radiation and radionuclides         | Radioiodines, including iodine-131<br>X-radiation and gamma-radiation |                                                         |
| Biliary tract                    | Chemicals and chemical mixtures     | 1,2-Dichloropropane                                                   |                                                         |
| Brain and central nervous system | Radiation and radionuclides         | X-radiation and gamma-radiation                                       |                                                         |
| Breast                           | Chemicals and chemical mixtures     |                                                                       | Dieldrin<br>Ethylene oxide<br>Polychlorinated biphenyls |
|                                  | Radiation and radionuclides         | X-radiation and gamma-radiation                                       |                                                         |
|                                  | Working hours                       |                                                                       | Night shift work                                        |
| Colon and Rectum                 | Airborne particles/complex mixtures |                                                                       | Asbestos (all forms)                                    |
|                                  | Radiation and radionuclides         | X-radiation and gamma-radiation                                       |                                                         |
|                                  | Occupation, industry or process     |                                                                       | Firefighter                                             |
|                                  | Working hours                       |                                                                       | Night shift work                                        |
| Eye                              | Radiation and radionuclides         | Ultraviolet radiation                                                 |                                                         |
| Ovary                            | Airborne particles/complex mixtures | Asbestos (all forms)                                                  |                                                         |
|                                  | Radiation and radionuclides         |                                                                       | X-radiation and gamma-radiation                         |
| Prostate                         | Chemicals and chemical mixtures     |                                                                       | Malathion                                               |

|                      |                                 |                                                                                                                                                               |                                                                       |
|----------------------|---------------------------------|---------------------------------------------------------------------------------------------------------------------------------------------------------------|-----------------------------------------------------------------------|
|                      | Metals and metal compounds      |                                                                                                                                                               | Arsenic and inorganic arsenic compounds<br>Cadmium and its compounds  |
|                      | Radiation and radionuclides     |                                                                                                                                                               | Thorium-232 and its decay products<br>X-radiation and gamma-radiation |
|                      | Occupation, industry or process |                                                                                                                                                               | Firefighter<br>Rubber manufacturing                                   |
|                      | Working hours                   |                                                                                                                                                               | Night shift work                                                      |
| Salivary Gland       | Radiation and radionuclides     | X-radiation and gamma-radiation                                                                                                                               | Radioiodines, including iodine-131                                    |
| Digestive tract      | Radiation and radionuclides     |                                                                                                                                                               | Radioiodines, including iodine-131                                    |
| Pancreas             | Radiation and radionuclides     |                                                                                                                                                               | X-radiation and gamma-radiation                                       |
| Testis               | Chemicals and chemical mixtures | Perfluorooctanoic acid (PFOA)                                                                                                                                 | DDT;<br>N,N-dimethylformamide                                         |
|                      | Occupation, industry or process |                                                                                                                                                               | Firefighter                                                           |
| None specified       | Chemicals and chemical mixtures |                                                                                                                                                               | 2-Bromopropane<br>Cobalt metal<br>Soluble cobalt(II) salts            |
|                      | Radiation and radionuclides     | Ionising radiation (all types)<br>Radionuclides, alpha-particle emitting, internally deposited<br>Radionuclides, beta-particle emitting, internally deposited |                                                                       |
| All cancers combined | Chemicals and chemical mixtures | 2,3,7,8-Tetrochlorodibenzo-para-dioxin                                                                                                                        |                                                                       |

DDT: Dichlorodiphenyltrichloroethane; NHL: Non-Hodgkin's lymphoma; PAH: Polycyclic aromatic hydrocarbons; PCB: Polychlorinated biphenyls

**Supplemental Table 2:** Possible occupational risk factors for cancer, non-malignant respiratory diseases, neurodegenerative diseases, cardiovascular and metabolic diseases, mental diseases, and musculoskeletal diseases – Chemical and biological agents

| Exposure                                                                                                                | Disease/disorder                    | Evidence for association | Areas to focus research on                                                                                  | References                                                                   |
|-------------------------------------------------------------------------------------------------------------------------|-------------------------------------|--------------------------|-------------------------------------------------------------------------------------------------------------|------------------------------------------------------------------------------|
| Acid mists<br>From strong inorganic acids                                                                               | Cancer, Larynx                      | Consistent               |                                                                                                             | Loomis (2018); Marant Micallef (2018)                                        |
|                                                                                                                         | Cancer, Lung                        | Limited/Inadequate       |                                                                                                             | Loomis (2018); Marant Micallef (2018)                                        |
| Agricultural dust<br>Grain farming                                                                                      | Idiopathic Pulmonary Fibrosis       | Limited/Inadequate       |                                                                                                             | Blanc (2019); Taskar (2006); Taskar (2008)                                   |
|                                                                                                                         | Sarcoidosis                         | Limited/Inadequate       |                                                                                                             | Blanc (2019); Taskar (2008)                                                  |
|                                                                                                                         | COPD, excess lung function decline  | Consistent               |                                                                                                             | Cullinan (2012); Fell (2014); Fontana (2017); Guillien (2019); Omland (2014) |
| Agrochemicals                                                                                                           | Stroke                              | Limited/Inadequate       | Prospective cohort studies; Studies on different exposures within agrochemicals; Adjustment for confounders | Sekhotha (2016)                                                              |
| Alcohol                                                                                                                 | COPD, excess lung function decline  | Limited/Inadequate       |                                                                                                             | Dumas (2019); Pourhassan (2019)                                              |
| Alpha-Chlorinated toluenes and benzoyl chloride (combined exposures)                                                    | Cancer, Lung                        | Limited/Inadequate       |                                                                                                             | Loomis (2018); Marant Micallef (2018)                                        |
| Aluminium                                                                                                               | Dementia                            | Limited/Inadequate       | Prospective cohort studies                                                                                  | Inan-Eroglu (2018); Virk (2015); Wang (2016)                                 |
| Ammonia                                                                                                                 | Chronic/irritant/perennial rhinitis | Limited/Inadequate       |                                                                                                             | Archangelidi (2020); Radon (2008); Stevens (2015)                            |
| Aromatic amine (4-Chloro-ortho-toluidine)                                                                               | Cancer, Urinary bladder             | Limited/Inadequate       |                                                                                                             | Loomis (2018); Marant Micallef (2018)                                        |
| Aromatic amines (2-Naphthylamine; 4-Aminobiphenyl; Auramine production; Benzidine; Magenta production; ortho-Toluidine) | Cancer, Urinary bladder             | Consistent               |                                                                                                             | Loomis (2018); Marant Micallef (2018)                                        |
| Arsenic and inorganic arsenic compounds                                                                                 | Cancer, Kidney                      | Limited/Inadequate       |                                                                                                             | Loomis (2018); Marant Micallef (2018)                                        |
|                                                                                                                         | Cancer, Liver                       | Limited/Inadequate       |                                                                                                             | Loomis (2018); Marant Micallef (2018)                                        |
|                                                                                                                         | Cancer, Lung                        | Consistent               |                                                                                                             | Loomis (2018); Marant Micallef (2018)                                        |
|                                                                                                                         | Cancer, Prostate                    | Limited/Inadequate       |                                                                                                             | Loomis (2018); Marant Micallef (2018)                                        |
|                                                                                                                         | Cancer, Skin                        | Consistent               |                                                                                                             | Loomis (2018); Marant Micallef (2018)                                        |
|                                                                                                                         | Cancer, Urinary bladder             | Consistent               |                                                                                                             | Loomis (2018); Marant Micallef (2018)                                        |
|                                                                                                                         | Hypertension                        | Limited/Inadequate       | Prospective cohort studies                                                                                  | Chen (2007); da Cunha Martins (2018)                                         |
|                                                                                                                         | Ischemic heart disease              | Consistent               |                                                                                                             | NEG (2020)                                                                   |
| Asbestos (all forms, including actinolite, amosite, anthophyllite, chrysotile, crocidolite, tremolite)                  | Cancer, Colon and Rectum            | Limited/Inadequate       |                                                                                                             | Loomis (2018); Marant Micallef (2018)                                        |
|                                                                                                                         | Cancer, Larynx                      | Consistent               |                                                                                                             | Loomis (2018); Marant Micallef (2018)                                        |
|                                                                                                                         | Cancer, Lung                        | Consistent               |                                                                                                             | Loomis (2018); Marant Micallef (2018)                                        |
|                                                                                                                         | Cancer, Mesothelioma                | Consistent               |                                                                                                             | Loomis (2018); Marant Micallef (2018)                                        |
|                                                                                                                         | Cancer, Nasopharynx                 | Limited/Inadequate       |                                                                                                             | Loomis (2018); Marant Micallef (2018)                                        |

|                                                                                         |                                     |                    |                                                              |                                                                                                                           |
|-----------------------------------------------------------------------------------------|-------------------------------------|--------------------|--------------------------------------------------------------|---------------------------------------------------------------------------------------------------------------------------|
|                                                                                         | Cancer, Ovary                       | Consistent         |                                                              | Loomis (2018); Marant Micallef (2018)                                                                                     |
|                                                                                         | Cancer, Stomach                     | Limited/Inadequate |                                                              | Loomis (2018); Marant Micallef (2018)                                                                                     |
|                                                                                         | Hypertension                        | Limited/Inadequate | Prospective cohort studies                                   | SBU (2017)                                                                                                                |
|                                                                                         | Ischemic heart disease              | Consistent         | Exposure-response; Gender differences; Critical time windows | SBU (2017)                                                                                                                |
|                                                                                         | Pneumoconiosis                      | Consistent         |                                                              | Wagner (1997); Standards (2014); McCunney (2009); Beer (2017); MacMurdo (2020); Borak (2016); Adams (2017); Taylor (2017) |
| Asphalt emissions                                                                       | COPD, excess lung function decline  | Limited/Inadequate |                                                              | Cullinan (2012); Omland (2014); Fell (2014); Ryu (2015); Alif (2016); Sadhra (2017); Schlünssen (2020)                    |
| Benzene                                                                                 | Cancer, Haematolymphatic system     | Consistent         |                                                              | Loomis (2018); Marant Micallef (2018)                                                                                     |
|                                                                                         | Cancer, Lung                        | Limited/Inadequate |                                                              | Loomis (2018); Marant Micallef (2018)                                                                                     |
| Benzo(a)pyrene                                                                          | Ischemic heart disease              | Limited/Inadequate | Prospective cohort studies                                   | SBU (2017)                                                                                                                |
| Beryllium and beryllium compounds                                                       | Cancer, Lung                        | Consistent         |                                                              | Loomis (2018); Marant Micallef (2018)                                                                                     |
|                                                                                         | Pneumoconiosis                      | Consistent         |                                                              | Wagner (1997); Standards (2014); McCunney (2009); Beer (2017); MacMurdo (2020); Borak (2016); Adams (2017); Taylor (2017) |
| Bis(chloromethyl)ether, chloromethyl methyl ether (technical grade)                     | Cancer, Lung                        | Consistent         |                                                              | Loomis (2018); Marant Micallef (2018)                                                                                     |
| Bisphenol A                                                                             | Diabetes mellitus (types 1 and 2)   | Limited/Inadequate | Prospective cohort studies                                   | Caporossi (2017)                                                                                                          |
| Bitumens (oxidized bitumens and hard bitumens) (during roofing and mastic asphalt work) | Cancer, Lung                        | Limited/Inadequate |                                                              | Loomis (2018); Marant Micallef (2018)                                                                                     |
| Bleach                                                                                  | Chronic/irritant/perennial rhinitis | Limited/Inadequate |                                                              | Archangelidi (2020); Radon (2008); Stevens (2015)                                                                         |
| Cadmium and cadmium compounds                                                           | Cancer, Kidney                      | Limited/Inadequate |                                                              | Loomis (2018); Marant Micallef (2018)                                                                                     |
|                                                                                         | Cancer, Lung                        | Consistent         |                                                              | Loomis (2018); Marant Micallef (2018)                                                                                     |
|                                                                                         | Cancer, Prostate                    | Limited/Inadequate |                                                              | Loomis (2018); Marant Micallef (2018)                                                                                     |
|                                                                                         | Dementia                            | Limited/Inadequate | Prospective cohort studies                                   | Bakulski (2020); Min (2016); Peng (2017)                                                                                  |
|                                                                                         | Hypertension                        | Limited/Inadequate | Prospective cohorts studies; Occupational setting            | da Cunha Martins (2018); Gallagher (2010)                                                                                 |
|                                                                                         | Ischemic heart disease              | Consistent         |                                                              | NEG (2020)                                                                                                                |
| Cadmium fume                                                                            | COPD, excess lung function decline  | Consistent         |                                                              | Cullinan (2012); Omland (2014); Fell (2014); Ryu (2015); Alif (2016); Sadhra (2017); Schlünssen (2020)                    |
| Carbon disulphide                                                                       | Ischemic heart disease              | Consistent         | Exposure-response; Gender differences; Critical time windows | SBU (2017)                                                                                                                |
|                                                                                         | Stroke                              | Limited/Inadequate | Prospective cohort studies                                   | SBU (2017)                                                                                                                |
| Carbon monoxide                                                                         | Ischemic heart disease              | Limited/Inadequate | Prospective cohort studies                                   | SBU (2017)                                                                                                                |



|                                             |                |                                                     |                    |                            |                                                                                                                           |
|---------------------------------------------|----------------|-----------------------------------------------------|--------------------|----------------------------|---------------------------------------------------------------------------------------------------------------------------|
| Cement dust                                 |                | COPD, excess lung function decline                  | Limited/Inadequate |                            | Cullinan (2012); Omland (2014); Fell (2014); Ryu (2015); Alif (2016); Sadhra (2017); Schlünssen (2020)                    |
| Chemicals, non-specified                    |                | Carpal tunnel syndrome                              | Limited/Inadequate | Prospective cohort studies | Roquelaure (2020)                                                                                                         |
|                                             |                | Low-Dose Repeated Exposures Irritant-Induced Asthma | Limited/Inadequate |                            | Bernstein (2021); Vandenplas (2014)                                                                                       |
| Chlorine gas                                |                | Chronic/irritant/perennial rhinitis                 | Limited/Inadequate |                            | Archangelidi (2020); Radon (2008); Stevens (2015)                                                                         |
|                                             |                | Low-Dose Repeated Exposures Irritant-Induced Asthma | Limited/Inadequate |                            | Bernstein (2021); Vandenplas (2014)                                                                                       |
| Chromium (VI) compounds                     |                | Cancer, Lung                                        | Consistent         |                            | Loomis (2018); Marant Micallef (2018)                                                                                     |
|                                             |                | Cancer, Nasal cavity and paranasal sinus            | Limited/Inadequate |                            | Loomis (2018); Marant Micallef (2018)                                                                                     |
| Cleaning agents & disinfectants             |                | COPD, excess lung function decline                  | Limited/Inadequate |                            | Dumas (2019); Pourhassan (2019)                                                                                           |
|                                             |                | Chronic/irritant/perennial rhinitis                 | Limited/Inadequate |                            | Archangelidi (2020); Radon (2008); Stevens (2015)                                                                         |
|                                             |                | Low-Dose Repeated Exposures Irritant-Induced Asthma | Limited/Inadequate |                            | Bernstein (2021); Vandenplas (2014)                                                                                       |
| Coal dust                                   | Coal mine dust | COPD, excess lung function decline                  | Consistent         |                            | Cullinan (2012); Omland (2014); Fell (2014); Ryu (2015); Alif (2016); Sadhra (2017); Schlünssen (2020)                    |
|                                             |                | Pneumoconiosis                                      | Consistent         |                            | Wagner (1997); Standards (2014); McCunney (2009); Beer (2017); MacMurdo (2020); Borak (2016); Adams (2017); Taylor (2017) |
|                                             | Non-silica     | Pneumoconiosis                                      | Consistent         |                            | Wagner (1997); Standards (2014); McCunney (2009); Beer (2017); MacMurdo (2020); Borak (2016); Adams (2017); Taylor (2017) |
| Coal-tar distillation                       |                | Cancer, Skin                                        | Consistent         |                            | Loomis (2018); Marant Micallef (2018)                                                                                     |
| Coal-tar pitch                              |                | Cancer, Skin                                        | Consistent         |                            | Loomis (2018); Marant Micallef (2018)                                                                                     |
| Cobalt metal                                |                | Cancer, Lung                                        | Limited/Inadequate |                            | IARC Monographs (2023)                                                                                                    |
| Coke oven emissions                         |                | COPD, excess lung function decline                  | Limited/Inadequate |                            | Cullinan (2012); Omland (2014); Fell (2014); Ryu (2015); Alif (2016); Sadhra (2017); Schlünssen (2020)                    |
| Combustion particles/fumes / engine exhaust |                | Low-Dose Repeated Exposures Irritant-Induced Asthma | Limited/Inadequate |                            | Bernstein (2021); Vandenplas (2014)                                                                                       |
|                                             |                | Ischemic heart disease                              | Consistent         |                            | NEG (2020)                                                                                                                |
| Cotton dust                                 |                | Sarcoidosis                                         | Limited/Inadequate |                            | Blanc (2019); Taskar (2008)                                                                                               |
| DDT                                         |                | Cancer, Haematolymphatic system                     | Limited/Inadequate |                            | Loomis (2018); Marant Micallef (2018)                                                                                     |
|                                             |                | Cancer, Liver                                       | Limited/Inadequate |                            | Loomis (2018); Marant Micallef (2018)                                                                                     |
|                                             |                | Cancer, Testis                                      | Limited/Inadequate |                            | Loomis (2018); Marant Micallef (2018)                                                                                     |
| Diazinon                                    |                | Cancer, Haematolymphatic system                     | Limited/Inadequate |                            | Loomis (2018); Marant Micallef (2018)                                                                                     |
|                                             |                | Cancer, Lung                                        | Limited/Inadequate |                            | Loomis (2018); Marant Micallef (2018)                                                                                     |
| Dichloromethane (methylene chloride)        |                | Cancer, Haematolymphatic system                     | Limited/Inadequate |                            | Loomis (2018); Marant Micallef (2018)                                                                                     |

|                                    |                                                     |                    |                                                                                                                      |
|------------------------------------|-----------------------------------------------------|--------------------|----------------------------------------------------------------------------------------------------------------------|
|                                    | Cancer, Liver                                       | Limited/Inadequate | Loomis (2018); Marant Micallef (2018)                                                                                |
|                                    | Ischemic heart disease                              | Limited/Inadequate | NEG (2020)                                                                                                           |
| Dieldrin                           | Cancer, Breast                                      | Limited/Inadequate | Loomis (2018); Marant Micallef (2018)                                                                                |
| Diesel motor exhaust               | Cancer, Lung                                        | Consistent         | Loomis (2018); Marant Micallef (2018)                                                                                |
|                                    | Cancer, Urinary bladder                             | Limited/Inadequate | Loomis (2018); Marant Micallef (2018)                                                                                |
|                                    | COPD, excess lung function decline                  | Limited/Inadequate | Cullinan (2012); Omland (2014); Fell (2014); Ryu (2015); Alif (2016); Sadhra (2017); Schlünssen (2020)               |
| Drugs (e.g., opiates, antibiotics) | Allergic IgE mediated asthma                        | Limited/Inadequate | Dalbøge (2020); Baur (2014); Cullinan (2020); Henneberger (2011); Maestrelli (2020); Arts (2020)                     |
|                                    | Allergic Non IgE mediated asthma                    | Limited/Inadequate | Dalbøge (2020); Baur (2014); Cullinan (2020); Henneberger (2011); Maestrelli (2020); Arts (2020)                     |
|                                    | Allergic rhinosinusitis/rhinitis                    | Limited/Inadequate | Radon (2008); Stevens (2015); Chiarella (2015); Hellgren (2008); Ameille (2013); Nicholson (2005); Vandenplas (2020) |
| Endotoxin                          | Allergic Non IgE mediated asthma                    | Consistent         | Dalbøge (2020); Baur (2014); Cullinan (2020); Henneberger (2011); Maestrelli (2020); Arts (2020)                     |
|                                    | COPD, excess lung function decline                  | Limited/Inadequate | Cullinan (2012); Fell (2014); Fontana (2017); Guillien (2019); Omland (2014)                                         |
| Enzymes                            | Allergic IgE mediated asthma                        | Consistent         | Dalbøge (2020); Baur (2014); Cullinan (2020); Henneberger (2011); Maestrelli (2020); Arts (2020)                     |
|                                    | Allergic rhinosinusitis/rhinitis                    | Consistent         | Radon (2008); Stevens (2015); Chiarella (2015); Hellgren (2008); Ameille (2013); Nicholson (2005); Vandenplas (2020) |
| Ethylene oxide                     | Cancer, Breast                                      | Limited/Inadequate | Loomis (2018); Marant Micallef (2018)                                                                                |
|                                    | Cancer, Haematolymphatic system                     | Limited/Inadequate | Loomis (2018); Marant Micallef (2018)                                                                                |
| Fish and animal proteins           | Allergic IgE mediated asthma                        | Consistent         | Dalbøge (2020); Baur (2014); Cullinan (2020); Henneberger (2011); Maestrelli (2020); Arts (2020)                     |
|                                    | Allergic rhinosinusitis/rhinitis                    | Consistent         | Radon (2008); Stevens (2015); Chiarella (2015); Hellgren (2008); Ameille (2013); Nicholson (2005); Vandenplas (2020) |
| Flour                              | Allergic IgE mediated asthma                        | Consistent         | Dalbøge (2020); Baur (2014); Cullinan (2020); Henneberger (2011); Maestrelli (2020); Arts (2020)                     |
|                                    | Allergic rhinosinusitis/rhinitis                    | Consistent         | Radon (2008); Stevens (2015); Chiarella (2015); Hellgren (2008); Ameille (2013); Nicholson (2005); Vandenplas (2020) |
|                                    | Hypersensitivity pneumonitis                        | Limited/Inadequate | Gerfaud-Valentin (2014); Kongsupon (2021)                                                                            |
| Fluoride (aluminium production)    | Low-Dose Repeated Exposures Irritant-Induced Asthma | Limited/Inadequate | Bernstein (2021); Vandenplas (2014)                                                                                  |
| Fluorocarbon                       | Hypersensitivity pneumonitis                        | Limited/Inadequate | Walters (2017)                                                                                                       |

|                                                                           |                                                                             |                    |                                                                                                                                                                                                                |                                                                                                                      |
|---------------------------------------------------------------------------|-----------------------------------------------------------------------------|--------------------|----------------------------------------------------------------------------------------------------------------------------------------------------------------------------------------------------------------|----------------------------------------------------------------------------------------------------------------------|
| Formaldehyde                                                              | Cancer, Haematolymphatic system                                             | Consistent         |                                                                                                                                                                                                                | Loomis (2018); Marant Micallef (2018)                                                                                |
|                                                                           | Cancer, Nasal cavity and paranasal sinus                                    | Limited/Inadequate |                                                                                                                                                                                                                | Loomis (2018); Marant Micallef (2018)                                                                                |
|                                                                           | Cancer, Nasopharynx                                                         | Consistent         |                                                                                                                                                                                                                | Loomis (2018); Marant Micallef (2018)                                                                                |
|                                                                           | COPD, excess lung function decline                                          | Limited/Inadequate |                                                                                                                                                                                                                | Dumas (2019); Pourhassan (2019)                                                                                      |
| Glutaraldehyde                                                            | COPD, excess lung function decline                                          | Limited/Inadequate |                                                                                                                                                                                                                | Dumas (2019); Pourhassan (2019)                                                                                      |
| Glyphosate                                                                | Cancer, Haematolymphatic system                                             | Limited/Inadequate |                                                                                                                                                                                                                | Loomis (2018); Marant Micallef (2018)                                                                                |
| Hydrazine                                                                 | Cancer, Lung                                                                | Limited/Inadequate |                                                                                                                                                                                                                | Loomis (2018); Marant Micallef (2018)                                                                                |
| Hydrocarbons including solvents                                           | Parkinson disease                                                           | Limited/Inadequate | Prospective cohort studies; Studies on specific agents (Specify exposure)                                                                                                                                      | Palin (2015); Goldman (2012)                                                                                         |
| Hydrochloric acid                                                         | Chronic/irritant/perennial rhinitis                                         | Limited/Inadequate |                                                                                                                                                                                                                | Archangelidi (2020); Radon (2008); Stevens (2015)                                                                    |
| Hydrogen peroxide                                                         | COPD, excess lung function decline                                          | Limited/Inadequate |                                                                                                                                                                                                                | Dumas (2019); Pourhassan (2019)                                                                                      |
| Hydrogen sulphide                                                         | Chronic/irritant/perennial rhinitis                                         | Limited/Inadequate |                                                                                                                                                                                                                | Archangelidi (2020); Radon (2008); Stevens (2015)                                                                    |
| Hypochlorite bleach                                                       | COPD, excess lung function decline                                          | Limited/Inadequate |                                                                                                                                                                                                                | Dumas (2019); Pourhassan (2019)                                                                                      |
| Insecticides                                                              | Non-arsenical<br>Cancer, Lung                                               | Limited/Inadequate |                                                                                                                                                                                                                | Loomis (2018); Marant Micallef (2018)                                                                                |
| Insects                                                                   | Allergic IgE mediated asthma                                                | Limited/Inadequate |                                                                                                                                                                                                                | Dalbøge (2020); Baur (2014); Cullinan (2020); Henneberger (2011); Maestrelli (2020); Arts (2020)                     |
| Irritants, non-specified                                                  | Acute Irritant Induced Asthma (Reactive Airways Dysfunction Syndrome -RADS) | Consistent         | Peak exposure assessment; Interaction (age, sex, atopy, gene-environment); Clarify frequency among occupational asthma cases (current estimates: 5-20%, differences partly due to different cases definitions) | Bernstein (2021); Vandenplas (2014)                                                                                  |
|                                                                           | Chronic/irritant/perennial rhinitis                                         | Consistent         | Critical time windows; Standardized outcome measures                                                                                                                                                           | Archangelidi (2020); Radon (2008); Stevens (2015)                                                                    |
|                                                                           | Low-Dose Repeated Exposures Irritant-Induced Asthma                         | Limited/Inadequate |                                                                                                                                                                                                                | Bernstein (2021); Vandenplas (2014)                                                                                  |
| Isocyanates                                                               | Allergic Non IgE mediated asthma                                            | Consistent         |                                                                                                                                                                                                                | Dalbøge (2020); Baur (2014); Cullinan (2020); Henneberger (2011); Maestrelli (2020); Arts (2020)                     |
|                                                                           | Hypersensitivity pneumonitis                                                | Limited/Inadequate |                                                                                                                                                                                                                | Barber (2017); Kongsupon (2021)                                                                                      |
| Lead                                                                      | Hypertension                                                                | Limited/Inadequate | Prospective cohort studies; Occupational setting                                                                                                                                                               | Gonick (2002); SBU (2017)                                                                                            |
|                                                                           | Ischemic heart disease                                                      | Consistent         |                                                                                                                                                                                                                | NEG (2020)                                                                                                           |
|                                                                           | Stroke                                                                      | Limited/Inadequate | Prospective cohort studies; Occupational setting                                                                                                                                                               | Navas-Acien (2007); SBU (2017)                                                                                       |
| Lead compounds, inorganic                                                 | Cancer, Stomach                                                             | Limited/Inadequate |                                                                                                                                                                                                                | Loomis (2018); Marant Micallef (2018)                                                                                |
| Leather dust                                                              | Cancer, Nasal cavity and paranasal sinus                                    | Consistent         |                                                                                                                                                                                                                | Loomis (2018); Marant Micallef (2018)                                                                                |
| Lindane                                                                   | Cancer, Haematolymphatic system                                             | Consistent         |                                                                                                                                                                                                                | Loomis (2018); Marant Micallef (2018)                                                                                |
| Low molecular weight allergens (e.g., platinum salts; phthalic anhydride) | Allergic IgE mediated asthma                                                | Consistent         |                                                                                                                                                                                                                | Dalbøge (2020); Baur (2014); Cullinan (2020); Henneberger (2011); Maestrelli (2020); Arts (2020)                     |
|                                                                           | Allergic rhinosinusitis/rhinitis                                            | Consistent         |                                                                                                                                                                                                                | Radon (2008); Stevens (2015); Chiarella (2015); Hellgren (2008); Ameille (2013); Nicholson (2005); Vandenplas (2020) |

|                                           |                                                                   |                    |                                                                    |                                                                                                                           |
|-------------------------------------------|-------------------------------------------------------------------|--------------------|--------------------------------------------------------------------|---------------------------------------------------------------------------------------------------------------------------|
| Malathion                                 | Cancer, Haematolymphatic system                                   | Limited/Inadequate |                                                                    | Loomis (2018); Marant Micallef (2018)                                                                                     |
|                                           | Cancer, Prostate                                                  | Limited/Inadequate |                                                                    | Loomis (2018); Marant Micallef (2018)                                                                                     |
| Manganese                                 | Parkinsonism                                                      | Consistent         | Critical time window                                               | Park (2013)                                                                                                               |
| Marine biomolecules (salmon)              | Hypersensitivity pneumonitis                                      | Limited/Inadequate |                                                                    | Tjalvin (2018)                                                                                                            |
| Mercury                                   | Stroke                                                            | Limited/Inadequate | Prospective cohort studies; Occupational setting                   | Hu (2021)                                                                                                                 |
|                                           | Methylmercury Ischemic heart disease                              | Limited/Inadequate |                                                                    | NEG (2020)                                                                                                                |
| Metals (combined)                         | Allergic Non IgE mediated asthma                                  | Limited/Inadequate |                                                                    | Dalbøge (2020); Baur (2014); Cullinan (2020); Henneberger (2011); Maestrelli (2020); Arts (2020)                          |
|                                           | Dementia                                                          | Limited/Inadequate | Prospective cohort studies; Specify exposure; Occupational setting | Bakulski (2020); Cicero (2017); Koeman (2015)                                                                             |
|                                           | Diabetes mellitus (types 1 and 2)                                 | Limited/Inadequate | Prospective cohort studies                                         | Liu (2016); Rana (2014)                                                                                                   |
|                                           | Idiopathic pulmonary fibrosis                                     | Limited/Inadequate |                                                                    | Blanc (2019); Taskar (2006); Taskar (2008)                                                                                |
|                                           | Parkinson disease                                                 | Limited/Inadequate | Prospective cohort studies; Reverse causation; Specify exposure    | Gunnarsson (2019)                                                                                                         |
|                                           | Pneumoconiosis                                                    | Limited/Inadequate |                                                                    | Wagner (1997); Standards (2014); McCunney (2009); Beer (2017); MacMurdo (2020); Borak (2016); Adams (2017); Taylor (2017) |
|                                           | Sarcoidosis                                                       | Limited/Inadequate |                                                                    | Blanc (2019); Taskar (2008)                                                                                               |
| Heavy metals                              | ALS                                                               | Limited/Inadequate | Prospective cohort studies; Reverse causation                      | Peters (2021); Wang (2017)                                                                                                |
| Hard metal                                | Pneumoconiosis                                                    | Consistent         |                                                                    | Wagner (1997); Standards (2014); McCunney (2009); Beer (2017); MacMurdo (2020); Borak (2016); Adams (2017); Taylor (2017) |
| Metalworking fluids                       | Ischemic heart disease                                            | Limited/Inadequate | Prospective cohort studies                                         | SBU (2017)                                                                                                                |
|                                           | Water-based, microbial contamination Hypersensitivity pneumonitis | Consistent         |                                                                    | Cullinan (2014); Burge (2016); Barber (2017); Kongsupon (2021)                                                            |
| Mineral fibres                            | Sarcoidosis                                                       | Limited/Inadequate | Exposure-response                                                  | Blanc (2019); Taskar (2008)                                                                                               |
| Mineral oils, untreated or treated mildly | Cancer, Skin                                                      | Consistent         |                                                                    | Loomis (2018); Marant Micallef (2018)                                                                                     |
| Mites                                     | Allergic IgE mediated asthma                                      | Consistent         |                                                                    | Dalbøge (2020); Baur (2014); Cullinan (2020); Henneberger (2011); Maestrelli (2020); Arts (2020)                          |
|                                           | Allergic rhinosinusitis/rhinitis                                  | Consistent         |                                                                    | Radon (2008); Stevens (2015); Chiarella (2015); Hellgren (2008); Ameille (2013); Nicholson (2005); Vandenplas (2020)      |
| Molluscs                                  | Allergic IgE mediated asthma                                      | Limited/Inadequate |                                                                    | Dalbøge (2020); Baur (2014); Cullinan (2020); Henneberger (2011); Maestrelli (2020); Arts (2020)                          |
| Mould                                     | Allergic IgE mediated asthma                                      | Limited/Inadequate |                                                                    | Dalbøge (2020); Baur (2014); Cullinan (2020); Henneberger (2011); Maestrelli (2020); Arts (2020)                          |
|                                           | Allergic Non IgE mediated asthma                                  | Limited/Inadequate |                                                                    | Dalbøge (2020); Baur (2014); Cullinan (2020); Henneberger (2011); Maestrelli (2020); Arts (2020)                          |

|                                                                          |                                          |                    |                                                                                               |                                                                                                                           |
|--------------------------------------------------------------------------|------------------------------------------|--------------------|-----------------------------------------------------------------------------------------------|---------------------------------------------------------------------------------------------------------------------------|
| Mould, fungus and mites                                                  | Hypersensitivity pneumonitis             | Consistent         |                                                                                               | Pepys (1965); Gerfaud-Valentin (2014); Cullinan (2014); Burge (2016); Barber (2017); Kongsupon (2021)                     |
| Mould and mildew                                                         | Sarcoidosis                              | Limited/Inadequate |                                                                                               | Blanc (2019); Taskar (2008)                                                                                               |
| N,N-dimethylformamide                                                    | Cancer, Testis                           | Limited/Inadequate |                                                                                               | Loomis (2018); Marant Micallef (2018)                                                                                     |
| Nickel compounds                                                         | Cancer, Lung                             | Consistent         |                                                                                               | Loomis (2018); Marant Micallef (2018)                                                                                     |
|                                                                          | Cancer, Nasal cavity and paranasal sinus | Consistent         |                                                                                               | Loomis (2018); Marant Micallef (2018)                                                                                     |
| Nitrogen hydroxide                                                       | Chronic/irritant/perennial rhinitis      | Limited/Inadequate |                                                                                               | Archangelidi (2020); Radon (2008); Stevens (2015)                                                                         |
| Nitroglycerine                                                           | Ischemic heart disease                   | Limited/Inadequate | Prospective cohort studies                                                                    | SBU (2017)                                                                                                                |
| Nylon                                                                    | Pneumoconiosis                           | Limited/Inadequate |                                                                                               | Wagner (1997); Standards (2014); McCunney (2009); Beer (2017); MacMurdo (2020); Borak (2016); Adams (2017); Taylor (2017) |
| PAHs                                                                     | Ischemic heart disease                   | Limited/Inadequate | Prospective cohort studies; Gender differences; Effect during pregnancy; Studies on morbidity | SBU (2017)                                                                                                                |
| Aluminium production; Coal gasification; Coal-tar pitch; Coke production | Cancer, Lung                             | Consistent         |                                                                                               | Loomis (2018); Marant Micallef (2018)                                                                                     |
|                                                                          | Carbon electrode manufacture; Creosotes  | Cancer, Lung       | Limited/Inadequate                                                                            | Loomis (2018); Marant Micallef (2018)                                                                                     |
| Creosotes                                                                | Cancer, Skin                             | Limited/Inadequate |                                                                                               | Loomis (2018); Marant Micallef (2018)                                                                                     |
| Coal tar pitch                                                           | Cancer, Urinary bladder                  | Limited/Inadequate |                                                                                               | Loomis (2018); Marant Micallef (2018)                                                                                     |
| Aluminium production                                                     | Cancer, Urinary bladder                  | Consistent         |                                                                                               | Loomis (2018); Marant Micallef (2018)                                                                                     |
| Pentachlorophenol                                                        | Cancer, Haematolymphatic system          | Consistent         |                                                                                               | Loomis (2018); Marant Micallef (2018)                                                                                     |
| Perfluorooctanoic acid (PFOA)                                            | Cancer, Testis                           | Consistent         |                                                                                               | IARC Monographs (2023)                                                                                                    |
|                                                                          | Cancer, Kidney                           | Consistent         |                                                                                               | IARC Monographs (2023)                                                                                                    |
| Pesticides                                                               | ALS                                      | Limited/Inadequate | Prospective cohort studies                                                                    | Wang (2017)                                                                                                               |
|                                                                          | COPD, excess lung function decline       | Limited/Inadequate |                                                                                               | Dumas (2019); Pourhassan (2019)                                                                                           |
|                                                                          | Dementia                                 | Limited/Inadequate | Prospective cohort studies; Specify exposure                                                  | Zaganas (2013)                                                                                                            |
|                                                                          | Parkinson disease                        | Consistent         | Exposure-response; Critical time window; Nature of exposure (specify exposure)                | Gunnarsson (2017); Martino (2017)                                                                                         |
|                                                                          | Sarcoidosis                              | Limited/Inadequate |                                                                                               | Huntley (2022)                                                                                                            |
|                                                                          | Suicide                                  | Consistent         | Objective exposure assessment; Specify exposure                                               | Freire (2013)                                                                                                             |
| Polychlorinated biphenyls                                                | Cancer, Breast                           | Limited/Inadequate |                                                                                               | Loomis (2018); Marant Micallef (2018)                                                                                     |
|                                                                          | Cancer, Haematolymphatic system          | Limited/Inadequate |                                                                                               | Loomis (2018); Marant Micallef (2018)                                                                                     |
|                                                                          | Cancer, Skin                             | Consistent         |                                                                                               | Loomis (2018); Marant Micallef (2018)                                                                                     |
| Proteins from birds                                                      | Hypersensitivity pneumonitis             | Consistent         |                                                                                               | Morell (2008); Ishizuka (2015); Cramer (2016); Barber (2017); Morell (2021)                                               |
| Quaternary ammonium compounds                                            | COPD, excess lung function decline       | Limited/Inadequate |                                                                                               | Dumas (2019); Pourhassan (2019)                                                                                           |
| Respirable crystalline silica                                            | ALS                                      | Limited/Inadequate | Prospective cohort studies                                                                    | Visser (2019)                                                                                                             |

|                                              |                                                                  |                    |                                                              |                                                                                                                           |
|----------------------------------------------|------------------------------------------------------------------|--------------------|--------------------------------------------------------------|---------------------------------------------------------------------------------------------------------------------------|
|                                              | Cancer, Lung                                                     | Consistent         |                                                              | Loomis (2018); Marant Micallef (2018)                                                                                     |
|                                              | COPD, excess lung function decline                               | Consistent         |                                                              | Cullinan (2012); Omland (2014); Fell (2014); Ryu (2015); Alif (2016); Sadhra (2017); Schlünssen (2020)                    |
|                                              | Ischemic heart disease                                           | Consistent         | Exposure-response; Gender differences; Critical time windows | SBU (2017); Sjögren (2020); Gustavsson (2019)                                                                             |
|                                              | Pneumoconiosis                                                   | Consistent         |                                                              | Wagner (1997); Standards (2014); McCunney (2009); Beer (2017); MacMurdo (2020); Borak (2016); Adams (2017); Taylor (2017) |
|                                              | Sarcoidosis                                                      | Limited/Inadequate |                                                              | Blanc (2019); Taskar (2008)                                                                                               |
| Rubber dust                                  | COPD, excess lung function decline                               | Limited/Inadequate |                                                              | Cullinan (2012); Fell (2014); Fontana (2017); Guillien (2019); Omland (2014)                                              |
| Shale oils                                   | Cancer, Skin                                                     | Consistent         |                                                              | Loomis (2018); Marant Micallef (2018)                                                                                     |
| Soluble cobalt(II) salts                     | Cancer, unspecified                                              | Limited/Inadequate |                                                              | IARC Monographs (2023)                                                                                                    |
| Solvents                                     | ALS                                                              | Limited/Inadequate | Objective exposure assessment                                | Wang (2017)                                                                                                               |
|                                              | Chronic/irritant/perennial rhinitis                              | Limited/Inadequate |                                                              | Archangelidi (2020); Radon (2008); Stevens (2015)                                                                         |
|                                              | Dementia                                                         | Limited/Inadequate | Prospective cohort studies; Specify exposure                 | Killin (2016); Koeman (2015)                                                                                              |
|                                              | Vapors<br>Low-Dose Repeated Exposures<br>Irritant-Induced Asthma | Consistent         |                                                              | Bernstein (2021); Vandenplas (2014)                                                                                       |
|                                              | Organic solvents<br>Multiple sclerosis                           | Limited/Inadequate | Nature and timing of exposure                                | Meca-Lallana (2021); Hedström (2018)                                                                                      |
| Soot                                         | Cancer, Lung                                                     | Consistent         |                                                              | Loomis (2018); Marant Micallef (2018)                                                                                     |
|                                              | Cancer, Skin                                                     | Consistent         |                                                              | Loomis (2018); Marant Micallef (2018)                                                                                     |
|                                              | Cancer, Urinary bladder                                          | Limited/Inadequate |                                                              | Loomis (2018); Marant Micallef (2018)                                                                                     |
| Stone/sand/silica dust                       | Idiopathic Pulmonary Fibrosis                                    | Limited/Inadequate |                                                              | Blanc (2019); Taskar (2006); Taskar (2008)                                                                                |
| Styrene                                      | Cancer, Haematolymphatic system                                  | Limited/Inadequate |                                                              | Loomis (2018); Marant Micallef (2018)                                                                                     |
|                                              | Hypersensitivity pneumonitis                                     | Limited/Inadequate |                                                              | Meyer (2018)                                                                                                              |
| Sulfur mustard                               | Cancer, Lung                                                     | Consistent         |                                                              | Loomis (2018); Marant Micallef (2018)                                                                                     |
| Talc                                         | Pneumoconiosis                                                   | Limited/Inadequate |                                                              | Wagner (1997); Standards (2014); McCunney (2009); Beer (2017); MacMurdo (2020); Borak (2016); Adams (2017); Taylor (2017) |
| TCDD (phenoxy acids containing TCDD(dioxin)) | Ischemic heart disease                                           | Consistent         | Exposure-response; Gender differences; Critical time windows | SBU (2017)                                                                                                                |
|                                              | Stroke                                                           | Limited/Inadequate | Prospective cohort studies                                   | SBU (2017)                                                                                                                |
| Tetrachloroethylene                          | Cancer, Urinary bladder                                          | Limited/Inadequate |                                                              | Loomis (2018); Marant Micallef (2018)                                                                                     |
| Textile dust (cotton, flax, jute)            | COPD, excess lung function decline                               | Consistent         |                                                              | Cullinan (2012); Fell (2014); Fontana (2017); Guillien (2019); Omland (2014)                                              |
| Trichloroethylene                            | Cancer, Haematolymphatic system                                  | Limited/Inadequate |                                                              | Loomis (2018); Marant Micallef (2018)                                                                                     |
|                                              | Cancer, Kidney                                                   | Consistent         |                                                              | Loomis (2018); Marant Micallef (2018)                                                                                     |
|                                              | Cancer, Liver                                                    | Limited/Inadequate |                                                              | Loomis (2018); Marant Micallef (2018)                                                                                     |
| Trivalent antimony                           | Cancer, Lung                                                     | Limited/Inadequate |                                                              | IARC Monographs (2023)                                                                                                    |

|                                                                            |                                          |                    |                                                                                          |                                                                                                                        |
|----------------------------------------------------------------------------|------------------------------------------|--------------------|------------------------------------------------------------------------------------------|------------------------------------------------------------------------------------------------------------------------|
| Vapours, dust, or fumes (non-specified)                                    | COPD, excess lung function decline       | Consistent         |                                                                                          | Cullinan (2012); Fell (2014); Omland (2014); Ryu (2015); Alif (2016); Sadhra (2017); Fuertes (2020); Schlünssen (2020) |
|                                                                            | Idiopathic Pulmonary Fibrosis            | Limited/Inadequate |                                                                                          | Blanc (2019); Taskar (2006); Taskar (2008)                                                                             |
| Vinyl chloride                                                             | Cancer, Liver                            | Consistent         |                                                                                          | Loomis (2018); Marant Micallef (2018)                                                                                  |
| Viral infection                                                            | ALS                                      | Limited/Inadequate | Prospective cohort studies                                                               | Wang (2017)                                                                                                            |
|                                                                            | Chronic rhinosinusitis                   | Limited/Inadequate | Prospective cohort studies; Objective exposure measures; Standardized outcome measures   | Geramas (2018); Sundaresan (2015); Clarhed (2018)                                                                      |
| Waterproofing spray                                                        | Hypersensitivity pneumonitis             | Limited/Inadequate |                                                                                          | Walters (2017)                                                                                                         |
| Welding and welding fumes                                                  | Cancer, Kidney                           | Limited/Inadequate |                                                                                          | Loomis (2018); Marant Micallef (2018)                                                                                  |
|                                                                            | Cancer, Lung                             | Consistent         |                                                                                          | Loomis (2018); Marant Micallef (2018)                                                                                  |
|                                                                            | COPD, excess lung function decline       | Consistent         |                                                                                          | Cullinan (2012); Omland (2014); Fell (2014); Ryu (2015); Alif (2016); Sadhra (2017); Schlünssen (2020)                 |
|                                                                            | Ischemic heart disease                   | Limited/Inadequate | Prospective cohort studies; Specify exposure; Relevant exposure metrics; Threshold limit | Sjögren (2020); Gustavsson (2019); SBU (2017)                                                                          |
| Western red cedar                                                          | Allergic Non IgE mediated asthma         | Consistent         |                                                                                          | Dalbøge (2020); Baur (2014); Cullinan (2020); Henneberger (2011); Maestrelli (2020); Arts (2020)                       |
| Wood dust                                                                  | Cancer, Nasal cavity and paranasal sinus | Consistent         |                                                                                          | Loomis (2018); Marant Micallef (2018)                                                                                  |
|                                                                            | Cancer, Nasopharynx                      | Consistent         |                                                                                          | Loomis (2018); Marant Micallef (2018)                                                                                  |
|                                                                            | COPD, excess lung function decline       | Limited/Inadequate |                                                                                          | Cullinan (2012); Fell (2014); Fontana (2017); Guillien (2019); Omland (2014)                                           |
|                                                                            | Idiopathic Pulmonary Fibrosis            | Limited/Inadequate |                                                                                          | Blanc (2019); Taskar (2006); Taskar (2008)                                                                             |
|                                                                            | Sarcoidosis                              | Limited/Inadequate |                                                                                          | Blanc (2019); Taskar (2008)                                                                                            |
| Including plants (e.g., obeche, latex)                                     | Allergic IgE mediated asthma             | Consistent         |                                                                                          | Dalbøge (2020); Baur (2014); Cullinan (2020); Henneberger (2011); Maestrelli (2020); Arts (2020)                       |
| Including plants (e.g., pine, beech, oak, iroko, Tobacco, paprika, coffee) | Allergic IgE mediated asthma             | Limited/Inadequate |                                                                                          | Dalbøge (2020); Baur (2014); Cullinan (2020); Henneberger (2011); Maestrelli (2020); Arts (2020)                       |
| Including plants (e.g., pine, beech, oak, iroko, tobacco, paprika, coffee) | Allergic Non IgE mediated asthma         | Limited/Inadequate |                                                                                          | Dalbøge (2020); Baur (2014); Cullinan (2020); Henneberger (2011); Maestrelli (2020); Arts (2020)                       |
| Including plants (e.g., obeche, latex)                                     | Allergic rhinosinusitis/rhinitis         | Consistent         |                                                                                          | Radon (2008); Stevens (2015); Chiarella (2015); Hellgren (2008); Ameille (2013); Nicholson (2005); Vandenplas (2020)   |
| Including plants (e.g., pine, beech, oak, iroko, Tobacco, paprika, coffee) | Allergic rhinosinusitis/rhinitis         | Limited/Inadequate |                                                                                          | Radon (2008); Stevens (2015); Chiarella (2015); Hellgren (2008); Ameille (2013); Nicholson (2005); Vandenplas (2020)   |
| Pine, MDF                                                                  | Hypersensitivity pneumonitis             | Limited/Inadequate |                                                                                          | Malmström (1999); Toribio (2012); Kongsupon (2021)                                                                     |
| 1,1,1-Trichloroethane                                                      | Cancer, Haematolymphatic system          | Limited/Inadequate |                                                                                          | IARC Monographs (2023)                                                                                                 |
| 1,2-Dichloropropane                                                        | Cancer, Biliary tract                    | Consistent         |                                                                                          | Loomis (2018); Marant Micallef (2018)                                                                                  |

|                                            |                                 |                    |                                       |
|--------------------------------------------|---------------------------------|--------------------|---------------------------------------|
| 1,3-Butadiene                              | Cancer, Haematolymphatic system | Consistent         | Loomis (2018); Marant Micallef (2018) |
| 2-Bromopropane                             | Cancer, unsepecified            | Limited/Inadequate | IARC Monographs (2023)                |
| 2,3,7,8-Tetrochlorodibenzo-<br>para-dioxin | All cancers combined            | Consistent         | Loomis (2018); Marant Micallef (2018) |
| 2-mercaptobenzothiazole                    | Cancer, Urinary bladder         | Limited/Inadequate | Loomis (2018); Marant Micallef (2018) |



**Supplemental Table 3:** Possible occupational risk factors for cancer, non-malignant respiratory diseases, neurodegenerative diseases, cardiovascular and metabolic diseases, mental disorders, and musculoskeletal diseases – Physical exposures, including radiation, radionuclides and trauma

| Exposure                                                     | Disease/disorder                                                 | Status of knowledge | Areas to focus research on                                                                                                                                          | References                                                                      |
|--------------------------------------------------------------|------------------------------------------------------------------|---------------------|---------------------------------------------------------------------------------------------------------------------------------------------------------------------|---------------------------------------------------------------------------------|
| Cold                                                         | Carpal tunnel syndrome                                           | Limited/Inadequate  | Prospective cohort studies                                                                                                                                          | Mäkinen (2009)                                                                  |
| Electric shock                                               | ALS                                                              | Limited/Inadequate  | Prospective cohort studies; Disentangle exposures related to electric work (Specify exposure)                                                                       | Peters (2019); Wang (2017)                                                      |
| ELF-MF                                                       | ALS                                                              | Consistent          | Exposure-response; Critical time window                                                                                                                             | Huss (2018)                                                                     |
|                                                              | Dementia                                                         | Limited/Inadequate  | Prospective cohort studies                                                                                                                                          | Gunnarsson (2018); Killin (2016); Koeman (2015)                                 |
|                                                              | Parkinson disease                                                | Limited/Inadequate  | Prospective cohort studies                                                                                                                                          | Gunnarsson (2019); Huss (2015)                                                  |
| Hand-arm vibration                                           | Carpal tunnel syndrome                                           | Consistent          | Gender differences; Exposure-response                                                                                                                               | Nilsson (2017); Kozak (2015); Barcenilla (2012); van Rijn (2009); Palmer (2007) |
|                                                              | Hand/wrist osteoarthritis                                        | Limited/Inadequate  | Prospective cohort studies; Gender differences; Exposure-response                                                                                                   | Hammer (2014)                                                                   |
|                                                              | Subacromial pain syndrome                                        | Limited/Inadequate  | Prospective cohort studies; Gender differences; Interaction between physical and psychosocial exposures                                                             | Dalbøge (2018); van der Molen (2017)                                            |
| Head trauma                                                  | Dementia                                                         | Limited/Inadequate  | Prospective cohort studies; More studies on non-military occupations such, and studies on potential differential disease risks in treated vs untreated head trauma. | Snyder (2018)                                                                   |
|                                                              | Parkinson disease                                                | Limited/Inadequate  | Prospective cohort studies; Reverse causation                                                                                                                       | Ascherio (2016); Harris (2013); Martino (2017)                                  |
| Ionising radiation (all types)                               | Cancer, none-specified                                           | Consistent          |                                                                                                                                                                     | Loomis (2018); Marant Micallef (2018)                                           |
|                                                              | Stroke                                                           | Limited/Inadequate  |                                                                                                                                                                     | SBU (2015)                                                                      |
| Noise                                                        | Dementia                                                         | Limited/Inadequate  | Prospective cohort studies; Occupational setting                                                                                                                    | Huang (2021)                                                                    |
|                                                              | Diabetes mellitus (types 1 and 2) and pregnancy related diabetes | Limited/Inadequate  | Prospective cohort studies                                                                                                                                          | Wang (2020); Lissåker (2021)                                                    |
|                                                              | Hypertension                                                     | Consistent          | Gender differences; Critical time windows; Low frequency noise, different occupational noise sources (machine, industry, pre-school, restaurant)                    | Basner (2014); Bolm-Audorff (2020); Skogstad (2016)                             |
|                                                              | Ischemic heart disease                                           | Limited/Inadequate  | Prospective cohort studies                                                                                                                                          | SBU (2015)                                                                      |
|                                                              | Stroke                                                           | Limited/Inadequate  | Prospective cohort studies; Objective measurements of exposure                                                                                                      | Teixeira (2021)                                                                 |
| Plutonium                                                    | Cancer, Bone                                                     | Consistent          |                                                                                                                                                                     | Loomis (2018); Marant Micallef (2018)                                           |
|                                                              | Cancer, Liver                                                    | Consistent          |                                                                                                                                                                     | Loomis (2018); Marant Micallef (2018)                                           |
|                                                              | Cancer, Lung                                                     | Consistent          |                                                                                                                                                                     | Loomis (2018); Marant Micallef (2018)                                           |
| Radioiodines, including iodine-131                           | Cancer, Bone                                                     | Limited/Inadequate  |                                                                                                                                                                     | Loomis (2018); Marant Micallef (2018)                                           |
|                                                              | Cancer, Digestive tract                                          | Limited/Inadequate  |                                                                                                                                                                     | Loomis (2018); Marant Micallef (2018)                                           |
|                                                              | Cancer, Haematolymphatic system                                  | Limited/Inadequate  |                                                                                                                                                                     | Loomis (2018); Marant Micallef (2018)                                           |
|                                                              | Cancer, Salivary Gland                                           | Limited/Inadequate  |                                                                                                                                                                     | Loomis (2018); Marant Micallef (2018)                                           |
|                                                              | Cancer, Thyroid                                                  | Consistent          |                                                                                                                                                                     | Loomis (2018); Marant Micallef (2018)                                           |
| Radionuclides, alpha-particle emitting, internally deposited | Cancer, none-specified                                           | Consistent          |                                                                                                                                                                     | Loomis (2018); Marant Micallef (2018)                                           |
| Radionuclides, beta-particle emitting, internally deposited  | Cancer, none-specified                                           | Consistent          |                                                                                                                                                                     | Loomis (2018); Marant Micallef (2018)                                           |

|                                               |                                                                  |                    |                                                                                                                            |                                                                 |
|-----------------------------------------------|------------------------------------------------------------------|--------------------|----------------------------------------------------------------------------------------------------------------------------|-----------------------------------------------------------------|
| Radium-224, -226, -228 and its decay products | Cancer, Bone                                                     | Consistent         |                                                                                                                            | Loomis (2018); Marant Micallef (2018)                           |
| Radium-226, -228 and its decay products       | Cancer, Nasal cavity and paranasal sinus                         | Consistent         |                                                                                                                            | Loomis (2018); Marant Micallef (2018)                           |
| Radon-222                                     | Cancer, Haematolymphatic system                                  | Limited/Inadequate |                                                                                                                            | Loomis (2018); Marant Micallef (2018)                           |
| Including decay products                      | Cancer, Lung                                                     | Consistent         |                                                                                                                            | Loomis (2018); Marant Micallef (2018)                           |
| Solar radiation                               | Cancer, Skin                                                     | Consistent         |                                                                                                                            | Loomis (2018); Marant Micallef (2018)                           |
| Thorium-232 and its decay products            | Cancer, Prostate                                                 | Limited/Inadequate |                                                                                                                            | Loomis (2018); Marant Micallef (2018)                           |
| Trauma                                        | ALS                                                              | Limited/Inadequate | Reverse causation                                                                                                          | Wang (2017)                                                     |
| Ultraviolet radiation                         | Cancer, Eye                                                      | Consistent         |                                                                                                                            | Loomis (2018); Marant Micallef (2018)                           |
|                                               | Cancer, Skin                                                     | Consistent         |                                                                                                                            | Loomis (2018); Marant Micallef (2018)                           |
| Whole-body vibration                          | Non-specific low back pain                                       | Consistent         | Gender differences; Exposure-response; Interaction between physical and psychosocial exposures                             | Lötters (2003); SBU (2014); Burström (2015); Hoogendoorn (1999) |
|                                               | Hip osteoarthritis                                               | Consistent         | Gender differences; Exposure-response                                                                                      | Gignac (2020)                                                   |
| Professional driving                          | Sciatic pain                                                     | Limited/Inadequate |                                                                                                                            | SBU (2014); Burström (2015); Bovenzi (2015)                     |
| Professional driving                          | Sciatica                                                         | Limited/Inadequate | Prospective cohort studies; Exposure-response; Gender differences; Interaction between physical and psychosocial exposures | Kuijer (2018)                                                   |
| Whole body vibration and hand-arm vibration   | Diabetes mellitus (types 1 and 2) and pregnancy-related diabetes | Limited/Inadequate | Prospective cohort studies; Adjustment for related occupational exposure (e.g., particles and physically strenuous work)   | Lapko (2017); Atal (2022); Skröder (2020)                       |
| X-radiation and gamma-radiation               | Cancer, Bone                                                     | Consistent         |                                                                                                                            | Loomis (2018); Marant Micallef (2018)                           |
|                                               | Cancer, Brain and central nervous system                         | Consistent         |                                                                                                                            | Loomis (2018); Marant Micallef (2018)                           |
|                                               | Cancer, Breast                                                   | Consistent         |                                                                                                                            | Loomis (2018); Marant Micallef (2018)                           |
|                                               | Cancer, Colon and Rectum                                         | Consistent         |                                                                                                                            | Loomis (2018); Marant Micallef (2018)                           |
|                                               | Cancer, Oesophagus                                               | Consistent         |                                                                                                                            | Loomis (2018); Marant Micallef (2018)                           |
|                                               | Cancer, Haematolymphatic system                                  | Consistent         |                                                                                                                            | Loomis (2018); Marant Micallef (2018)                           |
|                                               | Cancer, Kidney                                                   | Consistent         |                                                                                                                            | Loomis (2018); Marant Micallef (2018)                           |
|                                               | Cancer, Liver                                                    | Limited/Inadequate |                                                                                                                            | Loomis (2018); Marant Micallef (2018)                           |
|                                               | Cancer, Lung                                                     | Consistent         |                                                                                                                            | Loomis (2018); Marant Micallef (2018)                           |
|                                               | Cancer, Ovary                                                    | Limited/Inadequate |                                                                                                                            | Loomis (2018); Marant Micallef (2018)                           |
|                                               | Cancer, Pancreas                                                 | Limited/Inadequate |                                                                                                                            | Loomis (2018); Marant Micallef (2018)                           |
|                                               | Cancer, Prostate                                                 | Limited/Inadequate |                                                                                                                            | Loomis (2018); Marant Micallef (2018)                           |

|                         |            |                                       |
|-------------------------|------------|---------------------------------------|
| Cancer, Salivary Gland  | Consistent | Loomis (2018); Marant Micallef (2018) |
| Cancer, Skin            | Consistent | Loomis (2018); Marant Micallef (2018) |
| Cancer, Stomach         | Consistent | Loomis (2018); Marant Micallef (2018) |
| Cancer, Thyroid         | Consistent | Loomis (2018); Marant Micallef (2018) |
| Cancer, Urinary bladder | Consistent | Loomis (2018); Marant Micallef (2018) |

ALS = amyotrophic lateral sclerosis; ELF-MF = extremely low-frequency magnetic fields

**Supplemental Table 4:** Possible occupational risk factors for cancer, non-malignant respiratory diseases, neurodegenerative diseases, cardiovascular and metabolic diseases, mental disorders, and musculoskeletal diseases – Biomechanical exposures

| Exposure                                         | Disease/disorder           | Status of knowledge | Areas to focus research on                                                                                                                                  | References                                                                                   |
|--------------------------------------------------|----------------------------|---------------------|-------------------------------------------------------------------------------------------------------------------------------------------------------------|----------------------------------------------------------------------------------------------|
| Arm elevation (hands at or above shoulder level) | Sciatic pain               | Limited/Inadequate  | Prospective cohort studies; Exposure-response; Gender differences; Interaction between physical and psychosocial exposures                                  | SBU (2014)                                                                                   |
|                                                  | Subacromial pain syndrome  | Consistent          | Prospective cohort studies; Gender differences; Exposure-response                                                                                           | Dalbøge (2018); van der Molen (2017), Seidler (2020); Wærsted (2020)                         |
| Carrying, pushing or pulling                     | Non-specific low back pain | Limited/Inadequate  | Prospective cohort studies; Objective exposure measurements; Gender differences; Exposure-response; Interaction between physical and psychosocial exposures | SBU (2014); Swain (2020)                                                                     |
| Climbing stairs                                  | Knee osteoarthritis        | Limited/Inadequate  | Gender differences; Exposure-response                                                                                                                       | Schram (2020); Verbeek (2017); Gignac (2020); Wang (2020)                                    |
| Combined biomechanical exposures                 | Subacromial pain syndrome  | Consistent          | Prospective cohort studies; Gender differences; Exposure-response                                                                                           | Dalbøge (2018); van der Molen (2017)                                                         |
|                                                  | Chronic low back pain      | Consistent          | Case control and cohort studies; exposure–response relation                                                                                                 | Jahn (2023)                                                                                  |
| Computer work                                    | Carpal tunnel syndrome     | Limited/Inadequate  | Adjustment for other occupational exposures                                                                                                                 | Coenen (2019); Shiri (2015); Kozak (2015); Mediouni (2014); van Rijn (2009); Thomsen (2008); |
| Extended/ flexed wrist                           | Carpal tunnel syndrome     | Limited/Inadequate  | Prospective cohort studies; Using an objective and conservative definition of CTS; Confounding; Gender differences                                          | Kozak (2015); You (2014); Barcenilla (2012); van Rijn (2009); Palmer (2007)                  |
| Forceful shoulder exertion                       | Subacromial pain syndrome  | Consistent          | Prospective cohort studies; Gender differences; Exposure-response                                                                                           | Dalbøge (2018); van der Molen (2017)                                                         |
| Hand force                                       | Carpal tunnel syndrome     | Consistent          | Gender differences; Exposure-response                                                                                                                       | Kozak (2015); Barcenilla (2012); van Rijn (2009)                                             |
|                                                  | Hand/wrist osteoarthritis  | Limited/Inadequate  | Prospective cohort studies; Gender differences; Exposure-response                                                                                           | Hammer (2014)                                                                                |
| Heavy lifting                                    | Hip osteoarthritis         | Consistent          | Gender differences; Exposure-response; Interaction with overweight/obesity                                                                                  | Schram (2020); Sun (2019); Gignac (2020); Canetti (2020)                                     |
|                                                  | Knee osteoarthritis        | Consistent          | Gender differences; Exposure-response; Interaction with overweight/obesity                                                                                  | Schram (2020); Verbeek (2017); Canetti (2020); Wang (2020)                                   |
|                                                  | Non-specific low back pain | Consistent          | Gender differences; Objective exposure measurements; Exposure-response; Interaction between physical and psychosocial exposures                             | SBU (2014); Swain (2020)                                                                     |
| Kneeling/squatting                               | Hip osteoarthritis         | Limited/Inadequate  | Prospective cohort studies; Exposure-response; Gender differences                                                                                           | Schram (2020); Canetti (2020)                                                                |
|                                                  | Knee osteoarthritis        | Consistent          | Gender differences; Interaction with overweight/obesity                                                                                                     | Schram (2020); Gignac (2020); Wang (2020); Verbeek (2017)                                    |
|                                                  | Non-specific low back pain | Limited/Inadequate  | Prospective cohort studies; Objective exposure measurements; Gender differences; Exposure-response; Interaction between physical and psychosocial exposures | SBU (2014)                                                                                   |
|                                                  | Sciatic pain               | Limited/Inadequate  | Prospective cohort studies; Exposure-response; Gender differences; Interaction between physical and psychosocial exposures                                  | SBU (2014); Cook (2014)                                                                      |
|                                                  | Sciatica                   | Limited/Inadequate  | Prospective cohort studies; Exposure-response; Gender differences; Interaction between physical and psychosocial exposures                                  | Kuijjer (2018)                                                                               |
| Lifting and bending of the trunk                 | Sciatica                   | Limited/Inadequate  | Prospective cohort studies; Exposure-response; Gender differences; Interaction between physical and psychosocial exposures                                  | Kuijjer (2018)                                                                               |
| Lifting and carrying                             | Hip osteoarthritis         | Limited/Inadequate  | Prospective cohort studies; Exposure-response; Gender differences                                                                                           | Gignac (2020); Canetti (2020)                                                                |
|                                                  | Knee osteoarthritis        | Limited/Inadequate  | Exposure-response; Gender differences                                                                                                                       | Gignac (2020); Wang (2020); Canetti (2020)                                                   |
|                                                  | Chronic low back pain      | Consistent          | Case control and cohort studies; exposure–response relation                                                                                                 | Jahn (2023)                                                                                  |
|                                                  | Sciatica                   | Limited/Inadequate  | Prospective cohort studies; Exposure-response; Gender differences; Interaction between physical and psychosocial exposures                                  | Kuijjer (2018)                                                                               |
| Lifting and kneeling/squatting                   | Knee osteoarthritis        | Limited/Inadequate  | Gender differences; Interaction with overweight/obesity                                                                                                     | Schram (2020); Verbeek (2017); Gignac (2020)                                                 |

|                                                 |                                 |                    |                                                                                                                                                             |                                                                 |
|-------------------------------------------------|---------------------------------|--------------------|-------------------------------------------------------------------------------------------------------------------------------------------------------------|-----------------------------------------------------------------|
| Manual material handling                        | Non-specific low back pain      | Consistent         | Gender differences; Objective exposure measurements; Exposure-response; Interaction between physical and psychosocial exposures                             | SBU (2014); Yassi (2013); Swain (2020)                          |
|                                                 | Sciatic pain                    | Limited/Inadequate | Prospective cohort studies; Exposure-response; Gender differences; Interaction between physical and psychosocial exposures                                  | SBU (2014)                                                      |
| Physically heavy work                           | ALS                             | Limited/Inadequate | Prospective cohort studies                                                                                                                                  | Wang (2017); Visser (2018); Gallo (2016); Westenberg (2021)     |
|                                                 | Ischemic heart disease          | Limited/Inadequate |                                                                                                                                                             | Sara (2018)                                                     |
|                                                 | Knee osteoarthritis             | Consistent         | Gender differences; Exposure-response                                                                                                                       | Gignac (2020)                                                   |
|                                                 | Non-specific low back pain      | Limited/Inadequate | Prospective cohort studies; Objective exposure measurements; Gender differences; Exposure-response; Interaction between physical and psychosocial exposures | SBU (2014); Swain (2020)                                        |
|                                                 | Sciatic pain                    | Limited/Inadequate | Prospective cohort studies; Exposure-response; Gender differences; Interaction between physical and psychosocial exposures                                  | SBU (2014); Bovenzi (2015)                                      |
|                                                 | Sciatica                        | Limited/Inadequate | Prospective cohort studies; Exposure-response; Gender differences; Interaction between physical and psychosocial exposures                                  | Kuijjer (2018)                                                  |
|                                                 | Stroke                          | Limited/Inadequate | Prospective cohort studies; Occupational setting; Adjustment for confounders; Subgroup-analysis (e.g., women)                                               | Muacevic and Adler, 2018                                        |
| Repetitive movement                             | Carpal tunnel syndrome          | Consistent         | Gender differences; Exposure-response                                                                                                                       | Kozak (2015); Barcenilla (2012); van Rijn (2009); Palmer (2007) |
|                                                 | Hand/wrist osteoarthritis       | Limited/Inadequate | Prospective cohort studies; Exposure-response; Gender differences                                                                                           | Hammer (2014); Gignac (2020)                                    |
|                                                 | Non-specific low back pain      | Limited/Inadequate | Prospective cohort studies; Objective exposure measurements; Gender differences; Exposure-response; Interaction between physical and psychosocial exposures | SBU (2014)                                                      |
| Repetitive shoulder movement                    | Subacromial pain syndrome       | Limited/Inadequate | Prospective cohort studies; Gender differences; Interaction between physical and psychosocial exposures                                                     | Dalbøge (2018); van der Molen (2017)                            |
| Sedentary work/sitting at work                  | Non-specific low back pain      | Limited/Inadequate | Prospective cohort studies; Objective exposure measurements; Gender differences; Exposure-response; Interaction between physical and psychosocial exposures | SBU (2014); Swain (2020)                                        |
|                                                 | Chronic low back pain           | Limited/Inadequate | Case-control and cohort studies                                                                                                                             | Jahn (2023)                                                     |
|                                                 | Obesity (general and abdominal) | Limited/Inadequate | Prospective cohort studies; Objective exposure assessment                                                                                                   | Shrestha (2016); van Uffelen (2010)                             |
|                                                 | Sciatic pain                    | Limited/Inadequate | Prospective cohort studies; Exposure-response; Gender differences; Interaction between physical and psychosocial exposures                                  | SBU (2014)                                                      |
|                                                 | Sciatica                        | Limited/Inadequate | Prospective cohort studies; Exposure-response; Gender differences; Interaction between physical and psychosocial exposures                                  | Kuijjer (2018)                                                  |
| Spinal loading                                  | Sciatic pain                    | Limited/Inadequate | Prospective cohort studies; Exposure-response; Gender differences; Interaction between physical and psychosocial exposures                                  | Bovenzi (2015)                                                  |
| Standing (alone or in combination with walking) | Hip osteoarthritis              | Limited/Inadequate | Prospective cohort studies; Exposure-response; Gender differences                                                                                           | Schram (2020); Canetti (2020)                                   |
|                                                 | Knee osteoarthritis             | Limited/Inadequate | Gender differences                                                                                                                                          | Schram et al. 2020; Wang et al., 2020; Canetti et al., 2020     |
|                                                 | Non-specific low back pain      | Limited/Inadequate | Prospective cohort studies; Objective exposure measurements; Gender differences; Exposure-response; Interaction between physical and psychosocial exposures | Swain (2020)                                                    |
|                                                 | Chronic low back pain           | Limited/Inadequate | Case-control and cohort studies; Exposure-response                                                                                                          | Jahn (2023)                                                     |
| Twisting of the trunk/Awkward trunk posture     | Non-specific low back pain      | Consistent         | Gender differences; Exposure-response; Interaction between physical and psychosocial exposures                                                              | SBU (2014); Swain (2020)                                        |
|                                                 | Chronic low back pain           | Consistent         | Non-neutral body positions; Case-control and cohort studies; Exposure-response                                                                              | Jahn (2023)                                                     |

|              |                    |                                                                                                                            |                         |
|--------------|--------------------|----------------------------------------------------------------------------------------------------------------------------|-------------------------|
| Sciatic pain | Limited/Inadequate | Prospective cohort studies; Exposure-response; Gender differences; Interaction between physical and psychosocial exposures | Cook (2014); SBU (2014) |
| Sciatica     | Limited/Inadequate | Prospective cohort studies; Exposure-response; Gender differences; Interaction between physical and psychosocial exposures | Kuijer (2018)           |

ALS = amyotrophic lateral sclerosis; CVD = cardiovascular diseases

**Supplemental Table 5:** Possible occupational risk factors for cancer, non-malignant respiratory diseases, neurodegenerative diseases, cardiovascular and metabolic diseases, mental disorders, and musculoskeletal diseases – Psychosocial and organizational exposures

| Exposure                               | Disease/disorder           | Status of knowledge | Areas to focus research on                                                                                                                                                   | References                                           |
|----------------------------------------|----------------------------|---------------------|------------------------------------------------------------------------------------------------------------------------------------------------------------------------------|------------------------------------------------------|
| Aggression by co-workers or supervisor | Burnout                    | Limited/Inadequate  | Prospective cohort studies                                                                                                                                                   | Pacheco (2021)                                       |
| Aggression by customer                 | Burnout                    | Consistent          | Gender and age differences; Threshold exposure; Beneficial versus detrimental effects                                                                                        | Pacheco (2021)                                       |
| Bullying                               | Anxiety                    | Consistent          | Interaction (age, sex and ethnic background)                                                                                                                                 | Boudrias (2021); Leach (2017); Verkuil (2015)        |
|                                        | Burnout                    | Consistent          | Gender and age differences; Threshold exposure; Beneficial versus detrimental effects                                                                                        | Boudrias (2021)                                      |
|                                        | Depression                 | Consistent          | Prospective cohort studies; Exposure-response; Combined/cumulative exposures; Beneficial versus detrimental factors; Causation; Interaction (age, sex and ethnic background) | Niedhammer (2021); Boudrias (2021); Mikkelsen (2021) |
|                                        | Suicide ideation           | Consistent          | Threshold exposure; Causal mechanism; Interaction (age, sex and ethnic background)                                                                                           | Boudrias (2021); Leach (2017)                        |
| Decision latitude                      | Burnout                    | Consistent          | Gender and age differences; Threshold exposure; Beneficial versus detrimental effects                                                                                        | Niedhammer (2021)                                    |
|                                        | Depression                 | Consistent          | Prospective cohort studies; Exposure-response; Combined/cumulative exposures; Beneficial versus detrimental factors; Causation; Interaction (age, sex and ethnic background) | Niedhammer (2021)                                    |
|                                        | Ischemic heart disease     | Consistent          |                                                                                                                                                                              | Sara (2018)                                          |
|                                        | Stroke                     | Limited/Inadequate  |                                                                                                                                                                              | SBU (2015)                                           |
|                                        | Subacromial pain syndrome  | Limited/Inadequate  |                                                                                                                                                                              | Dalbøge (2018); van der Molen (2017)                 |
|                                        | Suicide                    | Limited/Inadequate  | Prospective cohort studies                                                                                                                                                   | Niedhammer (2021)                                    |
|                                        | Suicide ideation           | Consistent          | Threshold exposure; Causal mechanism; Interaction (age, sex and ethnic background)                                                                                           | Niedhammer (2021)                                    |
| Development possibilities              | Depression                 | Limited/Inadequate  | Prospective cohort studies; Longer follow-up periods (from first employment)                                                                                                 | Theorell (2015)                                      |
| Effort-reward imbalance                | Burnout                    | Limited/Inadequate  |                                                                                                                                                                              | Niedhammer (2021)                                    |
|                                        | Depression                 | Consistent          | Prospective cohort studies; Exposure-response; Combined/cumulative exposures; Beneficial versus detrimental factors; Causation; Interaction (age, sex and ethnic background) | Niedhammer (2021)                                    |
|                                        | Hypertension               | Limited/Inadequate  | Prospective cohort studies                                                                                                                                                   | SBU (2015)                                           |
|                                        | Ischemic heart disease     | Limited/Inadequate  |                                                                                                                                                                              | Sara (2018)                                          |
|                                        | Non-specific low back pain | Limited/Inadequate  | Prospective cohort studies; Objective exposure measurements; Gender differences; Exposure-response; Interaction between physical and psychosocial exposures                  | Bernal (2015); Buruck (2019)                         |
|                                        | Suicide ideation           | Limited/Inadequate  | Prospective cohort studies                                                                                                                                                   | Niedhammer (2021)                                    |
| Emotional demands                      | Burnout                    | Consistent          | Gender and age differences; Threshold exposure; Beneficial versus detrimental effects                                                                                        | Niedhammer (2021)                                    |
|                                        | Depression                 | Consistent          | Prospective cohort studies; Exposure-response; Combined/cumulative exposures; Beneficial versus detrimental factors; Causation; Interaction (age, sex and ethnic background) | Mikkelsen (2021)                                     |
| Iso strain                             | Sciatic pain               | Limited/Inadequate  | Prospective cohort studies; Exposure-response; Gender differences; Interaction between physical and psychosocial exposures                                                   | Bovenzi (2015); SBU (2014)                           |
| Job complexity                         | Dementia                   | Limited/Inadequate  | Prospective cohort studies; Adjustment for related occupational exposures; Reverse causation                                                                                 | Gunnarsson (2019); Then (2014)                       |
| Job strain                             | Depression                 | Consistent          | Prospective cohort studies; Exposure-response; Combined/cumulative exposures; Beneficial versus detrimental factors; Causation; Interaction (age, sex and ethnic background) | Niedhammer (2021); Mikkelsen (2021); Madsen (2017)   |
|                                        | Hypertension               | Limited/Inadequate  | Prospective cohort studies; Specify exposure                                                                                                                                 | Babu (2014); Gilbert-Ouimet (2014); SBU (2015)       |
|                                        | Ischemic heart disease     | Consistent          |                                                                                                                                                                              | Sara (2018)                                          |

|                                      |                                 |                    |                                                                                                                                                                                |                                                                                    |
|--------------------------------------|---------------------------------|--------------------|--------------------------------------------------------------------------------------------------------------------------------------------------------------------------------|------------------------------------------------------------------------------------|
|                                      | Non-specific low back pain      | Consistent         | Gender differences; Exposure-response; Interaction between physical and psychosocial exposures                                                                                 | Bernal (2015); Lang (2012)                                                         |
|                                      | Obesity (general and abdominal) | Limited/Inadequate | Prospective cohort studies; Specify exposure (frequency and duration); Bidirectional causality; Adjustment for lifestyle factors (e.g., physical activity); Gender differences | Overgaard (2004); Nyberg (2012); Solovieva (2013); Nyberg (2013); Kivimäki (2015a) |
|                                      | Suicide ideation                | Limited/Inadequate | Prospective cohort studies                                                                                                                                                     | Niedhammer (2021)                                                                  |
| Job control                          | Carpal tunnel syndrome          | Limited/Inadequate | Prospective cohort studies; Adjustment for confounders                                                                                                                         | Mansfield (2018); van Rijn (2009)                                                  |
|                                      | Dementia                        | Limited/Inadequate | Specify exposure; Adjustment for related occupational exposures                                                                                                                | Gunnarsson (2019); Then (2014)                                                     |
|                                      | Depression                      | Consistent         | Prospective cohort studies; Exposure-response; Combined/cumulative exposures; Beneficial versus detrimental factors; Causation; Interaction (age, sex and ethnic background)   | Mikkelsen (2021)                                                                   |
|                                      | Non-specific low back pain      | Consistent         | Gender differences; Exposure-response; Interaction between physical and psychosocial exposures                                                                                 | Bernal (2015); Buruck (2019); Lang (2012); Thiese (2020)                           |
|                                      | Subacromial pain syndrome       | Limited/Inadequate | Prospective cohort studies; Gender differences; Interaction between physical and psychosocial exposures                                                                        | Dalbøge (2018); van der Molen (2017)                                               |
| Job insecurity                       | Anxiety                         | Limited/Inadequate | Prospective cohort studies                                                                                                                                                     | Niedhammer (2021)                                                                  |
|                                      | Burnout                         | Limited/Inadequate | Prospective cohort studies                                                                                                                                                     | Niedhammer (2021)                                                                  |
|                                      | Depression                      | Consistent         | Prospective cohort studies; Exposure-response; Combined/cumulative exposures; Beneficial versus detrimental factors; Causation; Interaction (age, sex and ethnic background)   | Niedhammer (2021); Mikkelsen (2021); Rönnblad (2019); Kim (2016)                   |
|                                      | Ischemic heart disease          | Limited/Inadequate |                                                                                                                                                                                | Sara (2018)                                                                        |
|                                      | Non-specific low back pain      | Limited/Inadequate | Prospective cohort studies; Objective exposure measurements; Gender differences; Exposure-response; Interaction between physical and psychosocial exposures                    | Lang (2012)                                                                        |
|                                      | Suicide ideation                | Consistent         | Threshold exposure; Causal mechanism; Interaction (age, sex and ethnic background)                                                                                             | Niedhammer (2021)                                                                  |
| Monotonous work                      | Non-specific low back pain      | Limited/Inadequate | Prospective cohort studies; Objective exposure measurements; Gender differences; Exposure-response; Interaction between physical and psychosocial exposures                    | Lang (2012)                                                                        |
| Organizational injustice             | Burnout                         | Limited/Inadequate | Prospective cohort studies                                                                                                                                                     | Niedhammer (2021)                                                                  |
| Procedural injustice                 | Depression                      | Limited/Inadequate | Prospective cohort studies; Longer follow-up periods (from first employment)                                                                                                   | Mikkelsen (2021); Theorell (2015)                                                  |
| Psychosocial demands                 | Burnout                         | Consistent         | Gender and age differences; Threshold exposure; Beneficial versus detrimental effects                                                                                          | Niedhammer (2021)                                                                  |
|                                      | Carpal tunnel syndrome          | Limited/Inadequate | Prospective cohort studies; Adjustment for confounders                                                                                                                         | Mansfield (2018); van Rijn (2009)                                                  |
|                                      | Depression                      | Limited/Inadequate | Prospective cohort studies; Longer follow-up periods (from first employment)                                                                                                   | Mikkelsen (2021)                                                                   |
|                                      | Ischemic heart disease          | Limited/Inadequate |                                                                                                                                                                                | Sara (2018)                                                                        |
|                                      | Non-specific low back pain      | Consistent         | Reversed or reciprocal causation between stressor and pain; Gender differences; Exposure-response; Interaction between physical and psychosocial exposures                     | Bernal (2015); Lang (2012)                                                         |
|                                      | Subacromial pain syndrome       | Limited/Inadequate | Prospective cohort studies; Gender differences; Interaction between physical and psychosocial exposures                                                                        | Dalbøge (2018); van der Molen (2017)                                               |
|                                      | Suicide                         | Limited/Inadequate | Prospective cohort studies                                                                                                                                                     | Niedhammer (2021)                                                                  |
|                                      | Suicide ideation                | Consistent         | Threshold exposure; Causal mechanism; Interaction (age, sex and ethnic background)                                                                                             | Niedhammer (2021)                                                                  |
| Psychosocial factors (non-specified) | Chronic rhinosinusitis          | Limited/Inadequate | Prospective cohort studies; Objective exposure measures; Standardized outcome measures                                                                                         | Geramas (2018); Sundaesan (2015); Clarhed (2018)                                   |
| Relation injustice                   | Depression                      | Limited/Inadequate | Prospective cohort studies; Longer follow-up periods (from first employment)                                                                                                   | Mikkelsen (2021); Theorell (2015)                                                  |
| Role conflict                        | Suicide ideation                | Limited/Inadequate | Prospective cohort studies                                                                                                                                                     | Milner (2018)                                                                      |
| Shift work                           | Anxiety                         | Limited/Inadequate | Too few studies                                                                                                                                                                | Torquati (2019)                                                                    |



|                              |                                 |                    |                                                                                                                                                                                  |                                                                                                         |
|------------------------------|---------------------------------|--------------------|----------------------------------------------------------------------------------------------------------------------------------------------------------------------------------|---------------------------------------------------------------------------------------------------------|
|                              | Depression                      | Consistent         | Prospective cohort studies; Exposure-response; Combined/cumulative exposures; Beneficial versus detrimental factors; Causation; Interaction (age, sex and ethnic background)     | Rivera (2020); Mikkelsen (2021); Torquati (2019)                                                        |
|                              | Hypertension                    | Limited/Inadequate | Prospective cohort studies; More studies on potential differential effect for rotating shift workers versus night shift workers                                                  | Deng (2018); Knutsson (2000); Manohar (2017)                                                            |
|                              | Obesity (general and abdominal) | Limited/Inadequate | Prospective cohort studies; Specify exposure; Healthy worker effect                                                                                                              | Esquirol (2011); Amani (2013); Proper (2016); Shrestha (2016); Saulle (2018); Sun (2018); Zhang (2020b) |
|                              | Stroke                          | Limited/Inadequate | Causal mechanism and mediating factors; Specify exposure (different types of shift work, intensity of shift, night work); The importance of consecutive nights and quick returns | Vyas (2012); Li (2016)                                                                                  |
| Shift work and working hours | Suicide ideation                | Limited/Inadequate | Prospective cohort studies                                                                                                                                                       | Milner (2018)                                                                                           |
| Shift work, night work       | Cancer, Breast                  | Limited/Inadequate |                                                                                                                                                                                  | Loomis (2018); Marant Micallef (2018)                                                                   |
|                              | Cancer, Colon and Rectum        | Limited/Inadequate |                                                                                                                                                                                  | Loomis (2018); Marant Micallef (2018)                                                                   |
|                              | Cancer, Prostate                | Limited/Inadequate |                                                                                                                                                                                  | Loomis (2018); Marant Micallef (2018)                                                                   |
|                              | Dementia                        | Limited/Inadequate | Prospective cohort studies                                                                                                                                                       | Bokenberger (2018); Nabe-Nielsen (2019)                                                                 |
|                              | Depression                      | Limited/Inadequate | Prospective cohort studies; Longer follow-up periods (from first employment)                                                                                                     | Lee (2017)                                                                                              |
|                              | Obesity (general and abdominal) | Consistent         | Detailed evaluation of shifts; Number of consecutive shifts; Quick returns etc.                                                                                                  | Sun (2018); Zhang (2020b)                                                                               |
|                              | Multiple sclerosis              | Limited/Inadequate |                                                                                                                                                                                  | Hedström (2015); Gustavsen (2016)                                                                       |
|                              | Ischemic heart disease          | Limited/Inadequate | Prospective cohort studies; Specify exposure; The importance of consecutive nights and quick returns                                                                             | Torquati (2018)                                                                                         |
| Skill discretion             | Depression                      | Limited/Inadequate | Prospective cohort studies; Longer follow-up periods (from first employment)                                                                                                     | Mikkelsen (2021)                                                                                        |
|                              | Sciatic pain                    | Limited/Inadequate | Prospective cohort studies; Exposure-response; Gender differences; Interaction between physical and psychosocial exposures                                                       | SBU (2014)                                                                                              |
| Social support               | Burnout                         | Consistent         | Gender and age differences; Threshold exposure; Beneficial versus detrimental effects                                                                                            | Niedhammer (2021)                                                                                       |
|                              | Carpal tunnel syndrome          | Limited/Inadequate | Prospective cohort studies; Adjustment for confounders                                                                                                                           | Mansfield (2018); van Rijn (2009)                                                                       |
|                              | Depression                      | Consistent         | Prospective cohort studies; Exposure-response; Combined/cumulative exposures; Beneficial versus detrimental factors; Causation; Interaction (age, sex and ethnic background)     | Mikkelsen (2021); Theorell (2015)                                                                       |
|                              | Ischemic heart disease          | Limited/Inadequate |                                                                                                                                                                                  | Sara (2018)                                                                                             |
|                              | Non-specific low back pain      | Limited/Inadequate | Prospective cohort studies; Objective exposure measurements; Gender differences; Exposure-response; Interaction between physical and psychosocial exposures                      | Bernal (2015); Buruck (2019); Campbell (2013); Lang (2012); Thiese (2020)                               |
|                              | Subacromial pain syndrome       | Limited/Inadequate |                                                                                                                                                                                  | Dalbøge (2018); van der Molen (2017)                                                                    |
|                              | Suicide                         | Limited/Inadequate | Prospective cohort studies                                                                                                                                                       | Niedhammer (2021)                                                                                       |
|                              | Suicide ideation                | Consistent         | Threshold exposure; Causal mechanism; Interaction (age, sex and ethnic background)                                                                                               | Milner (2018)                                                                                           |
| Temporary agency work        | Anxiety                         | Limited/Inadequate | Prospective cohort studies                                                                                                                                                       | Hünefeld (2020)                                                                                         |
|                              | Burnout                         | Limited/Inadequate | Prospective cohort studies                                                                                                                                                       | Hünefeld (2020)                                                                                         |
|                              | Depression                      | Limited/Inadequate | Prospective cohort studies                                                                                                                                                       | Hünefeld (2020)                                                                                         |
| Temporary employment         | Depression                      | Limited/Inadequate | Prospective cohort studies; Longer follow-up periods (from first employment)                                                                                                     | Rönnblad (2019)                                                                                         |

|                              |                                                                  |                    |                                                                                                                                                                              |                                                                                  |
|------------------------------|------------------------------------------------------------------|--------------------|------------------------------------------------------------------------------------------------------------------------------------------------------------------------------|----------------------------------------------------------------------------------|
| Violence or threats          | Anxiety                                                          | Limited/Inadequate | Prospective cohort studies                                                                                                                                                   | Niedhammer (2021); Rudkjoebing (2020)                                            |
|                              | Burnout                                                          | Consistent         | Gender and age differences; Threshold exposure; Beneficial versus detrimental effects                                                                                        | Niedhammer (2021); Rudkjoebing (2020)                                            |
|                              | Depression                                                       | Consistent         | Prospective cohort studies; Exposure-response; Combined/cumulative exposures; Beneficial versus detrimental factors; Causation; Interaction (age, sex and ethnic background) | Niedhammer (2021); Mikkelsen (2021); Rudkjoebing (2020)                          |
| Working hours                | Anxiety                                                          | Limited/Inadequate | Too few studies                                                                                                                                                              | Niedhammer (2021)                                                                |
|                              | Depression                                                       | Consistent         | Prospective cohort studies; Exposure-response; Combined/cumulative exposures; Beneficial versus detrimental factors; Causation; Interaction (age, sex and ethnic background) | Niedhammer (2021); Mikkelsen (2021); Madsen (2017); Virtanen (2018); Wong (2019) |
|                              | Diabetes mellitus (types 1 and 2) and pregnancy related diabetes | Limited/Inadequate | Better exposure assessment; Adjustment for related occupational exposures                                                                                                    | Sui (2016)                                                                       |
| Long working hours           | Obesity (general and abdominal)                                  | Limited/Inadequate | Prospective cohort studies; Exposure-response                                                                                                                                | Solovieva (2013); Virtanen (2020); Zhu (2020); Li (2021)                         |
|                              | Ischemic heart disease                                           | Consistent         |                                                                                                                                                                              | NEG (2020)                                                                       |
|                              | Stroke                                                           | Consistent         | Causal mechanism; Objective measured exposure; More studies on subgroups of gender and type of stroke.                                                                       | Descatha (2020); Kivimäki (2015b)                                                |
| Long/irregular working hours | Sciatic pain                                                     | Limited/Inadequate | Prospective cohort studies; Exposure-response; Gender differences; Interaction between physical and psychosocial exposures                                                   | SBU (2014)                                                                       |
| Workplace conflicts          | Depression                                                       | Limited/Inadequate | Prospective cohort studies                                                                                                                                                   | Theorell (2015)                                                                  |

**Supplemental Table 6:** Possible occupational risk factors for cancer, non-malignant respiratory diseases, neurodegenerative diseases, cardiovascular and metabolic diseases, mental disorders, and musculoskeletal diseases – Occupation, industry, and process

| Exposure                                               | Disease/disorder                         | Status of knowledge | Areas to focus research on                                                                                         | References                                                                                             |
|--------------------------------------------------------|------------------------------------------|---------------------|--------------------------------------------------------------------------------------------------------------------|--------------------------------------------------------------------------------------------------------|
| Acheson process                                        | Cancer, Lung                             | Consistent          | Specify exposure                                                                                                   | Loomis (2018); Marant Micallef (2018)                                                                  |
| Automobile manufacturing                               | Sarcoidosis                              | Limited/Inadequate  | Specify exposure                                                                                                   | Taskar (2008); Blanc (2019)                                                                            |
| Electrolytic production of aluminium                   | Ischemic heart disease                   | Limited/Inadequate  | Prospective cohort studies                                                                                         | SBU (2017)                                                                                             |
|                                                        | Stroke                                   | Limited/Inadequate  | Prospective cohort studies                                                                                         | SBU (2017)                                                                                             |
| Fire fighting                                          | Cancer, Colon                            | Limited/Inadequate  |                                                                                                                    | Demers (2022)                                                                                          |
|                                                        | Cancer, Melanoma of the skin             | Limited/Inadequate  |                                                                                                                    | Demers (2022)                                                                                          |
|                                                        | Cancer, Mesothelioma                     | Consistent          |                                                                                                                    | Demers (2022)                                                                                          |
|                                                        | Cancer, Non-Hodgkin lymphoma             | Limited/Inadequate  |                                                                                                                    | Demers (2022)                                                                                          |
|                                                        | Cancer, Prostate                         | Limited/Inadequate  |                                                                                                                    | Demers (2022)                                                                                          |
|                                                        | Cancer, Testis                           | Limited/Inadequate  |                                                                                                                    | Demers (2022)                                                                                          |
|                                                        | Cancer, Urinary bladder                  | Consistent          |                                                                                                                    | Demers (2022)                                                                                          |
|                                                        | Ischemic heart disease                   | Limited/Inadequate  | Selection into and out workforce (by finding appropriate comparison groups and/or using cohort- internal analyses) | Soteriades (2011); Sjögren (2020)                                                                      |
| Glass production                                       | Sarcoidosis                              | Limited/Inadequate  | Specify exposure                                                                                                   | Taskar (2008); Blanc (2019)                                                                            |
|                                                        | Cancer, Lung                             | Limited/Inadequate  |                                                                                                                    | Loomis (2018); Marant Micallef (2018)                                                                  |
| Including ceramic production                           | COPD, excess lung function decline       | Limited/Inadequate  | Specify exposure                                                                                                   | Cullinan (2012); Omland (2014); Fell (2014); Ryu (2015); Alif (2016); Sadhra (2017); Schlünssen (2020) |
| Hairdressing                                           | Cancer, Urinary bladder                  | Limited/Inadequate  |                                                                                                                    | Loomis (2018); Marant Micallef (2018)                                                                  |
|                                                        | Idiopathic Pulmonary Fibrosis            | Limited/Inadequate  | Specify exposure                                                                                                   | Taskar (2006); Taskar (2008) Blanc (2019)                                                              |
| Hematite mining (underground, with exposure to radon)  | Cancer, Lung                             | Consistent          |                                                                                                                    | Loomis (2018); Marant Micallef (2018)                                                                  |
| Iron and steel founding (occupational exposure during) | Cancer, Lung                             | Consistent          |                                                                                                                    | Loomis (2018); Marant Micallef (2018)                                                                  |
| Isopropyl alcohol manufacturing using strong acids     | Cancer, Nasal cavity and paranasal sinus | Consistent          |                                                                                                                    | Loomis (2018); Marant Micallef (2018)                                                                  |
| Military service                                       | ALS                                      | Consistent          | Nature of exposure within military service (Specify exposure)                                                      | Al-Chalabi (2013); Wang (2017)                                                                         |
|                                                        | Sarcoidosis                              | Limited/Inadequate  | Specify exposure                                                                                                   | Taskar (2008); Blanc (2019)                                                                            |
| Painter                                                | Cancer, Lung                             | Consistent          |                                                                                                                    | Loomis (2018); Marant Micallef (2018)                                                                  |
|                                                        | Cancer, Mesothelioma                     | Consistent          |                                                                                                                    | Loomis (2018); Marant Micallef (2018)                                                                  |
|                                                        | Cancer, Urinary bladder                  | Consistent          |                                                                                                                    | Loomis (2018); Marant Micallef (2018)                                                                  |
| Paper production (using sulphate pulping process)      | Ischemic heart disease                   | Limited/Inadequate  | Prospective cohort studies                                                                                         | SBU (2017)                                                                                             |
| Petroleum production                                   | COPD, excess lung function decline       | Limited/Inadequate  | Specify exposure                                                                                                   | Cullinan (2012); Omland (2014); Fell (2014); Ryu (2015); Alif (2016); Sadhra (2017); Schlünssen (2020) |

|                      |                                    |                    |                  |                                                                                                        |
|----------------------|------------------------------------|--------------------|------------------|--------------------------------------------------------------------------------------------------------|
| Petroleum refining   | Cancer, Skin                       | Limited/Inadequate |                  | Loomis (2018); Marant Micallef (2018)                                                                  |
| Raising birds        | Idiopathic Pulmonary Fibrosis      | Limited/Inadequate | Specify exposure | Taskar (2006); Taskar (2008) Blanc (2019)                                                              |
|                      | Sarcoidosis                        | Limited/Inadequate | Specify exposure | Taskar (2008); Blanc (2019)                                                                            |
| Rubber manufacturing | Cancer, Oesophagus                 | Limited/Inadequate |                  | Loomis (2018); Marant Micallef (2018)                                                                  |
|                      | Cancer, Haematolymphatic system    | Consistent         |                  | Loomis (2018); Marant Micallef (2018)                                                                  |
|                      | Cancer, Larynx                     | Limited/Inadequate |                  | Loomis (2018); Marant Micallef (2018)                                                                  |
|                      | Cancer, Lung                       | Consistent         |                  | Loomis (2018); Marant Micallef (2018)                                                                  |
|                      | Cancer, Prostate                   | Limited/Inadequate |                  | Loomis (2018); Marant Micallef (2018)                                                                  |
|                      | Cancer, Stomach                    | Consistent         |                  | Loomis (2018); Marant Micallef (2018)                                                                  |
|                      | Cancer, Urinary bladder            | Consistent         |                  | Loomis (2018); Marant Micallef (2018)                                                                  |
| Tunnel work          | COPD, excess lung function decline | Limited/Inadequate | Specify exposure | Cullinan (2012); Omland (2014); Fell (2014); Ryu (2015); Alif (2016); Sadhra (2017); Schlünssen (2020) |

COPD = chronic obstructive pulmonary disease; ALS = amyotrophic lateral sclerosis

## References:

- Adams, T. N., Butt, Y. M., Batra, K., & Glazer, C. S. (2017). Cobalt related interstitial lung disease. *Respir Med*, *129*, 91-97. <https://doi.org/10.1016/j.rmed.2017.06.008>
- Al-Chalabi, A., & Hardiman, O. (2013). The epidemiology of ALS: a conspiracy of genes, environment and time. *Nat Rev Neurol*, *9*(11), 617-628. <https://doi.org/10.1038/nrneurol.2013.203>
- Alif, S. M., Dharmage, S. C., Bowatte, G., Karahalios, A., Benke, G., Dennekamp, M., Mehta, A. J., Miedinger, D., Künzli, N., Probst-Hensch, N., & Matheson, M. C. (2016). Occupational exposure and risk of chronic obstructive pulmonary disease: a systematic review and meta-analysis. *Expert Rev Respir Med*, *10*(8), 861-872. <https://doi.org/10.1080/17476348.2016.1190274>
- Amani, R., & Gill, T. (2013). Shiftworking, nutrition and obesity: implications for workforce health- a systematic review. *Asia Pac J Clin Nutr*, *22*(4), 505-515. <https://doi.org/10.6133/apjcn.2013.22.4.11>
- Ameille, J., Hamelin, K., Andujar, P., Bensefa-Colas, L., Bonnetterre, V., Dupas, D., Garnier, R., Loddé, B. A., Rinaldo, M., Descatha, A., Lasfargues, G., & Pairon, J. C. (2013). Occupational asthma and occupational rhinitis: the united airways disease model revisited. *Occup Environ Med*, *70*(7), 471-475. <https://doi.org/10.1136/oemed-2012-101048>
- Archangelidi, O., Sathiyajit, S., Consonni, D., Jarvis, D., & De Matteis, S. (2020). Cleaning products and respiratory health outcomes in occupational cleaners: a systematic review and meta-analysis. *Occup Environ Med*. <https://doi.org/10.1136/oemed-2020-106776>
- Arts, J. (2020). How to assess respiratory sensitization of low molecular weight chemicals? *Int J Hyg Environ Health*, *225*, 113469. <https://doi.org/10.1016/j.ijheh.2020.113469>
- Ascherio, A., & Schwarzschild, M. A. (2016). The epidemiology of Parkinson's disease: risk factors and prevention. *Lancet Neurol*, *15*(12), 1257-1272. [https://doi.org/10.1016/s1474-4422\(16\)30230-7](https://doi.org/10.1016/s1474-4422(16)30230-7)
- Atal, M. K., Palei, S. K., Chaudhary, D. K., Kumar, V., & Karmakar, N. C. (2022). Occupational exposure of dumper operators to whole-body vibration in opencast coal mines: an approach for risk assessment using a Bayesian network. *Int J Occup Saf Ergon*, *28*(2), 758-765. <https://doi.org/10.1080/10803548.2020.1828551>

- Babu, G. R., Jotheeswaran, A. T., Mahapatra, T., Mahapatra, S., Kumar, A., Sr., Detels, R., & Pearce, N. (2014). Is hypertension associated with job strain? A meta-analysis of observational studies. *Occup Environ Med*, *71*(3), 220-227. <https://doi.org/10.1136/oemed-2013-101396>
- Bakulski, K. M., Seo, Y. A., Hickman, R. C., Brandt, D., Vadari, H. S., Hu, H., & Park, S. K. (2020). Heavy Metals Exposure and Alzheimer's Disease and Related Dementias. *J Alzheimers Dis*, *76*(4), 1215-1242. <https://doi.org/10.3233/jad-200282>
- Barber, C. M., Wiggans, R. E., Carder, M., & Agius, R. (2017). Epidemiology of occupational hypersensitivity pneumonitis; reports from the SWORD scheme in the UK from 1996 to 2015. *Occup Environ Med*, *74*(7), 528-530. <https://doi.org/10.1136/oemed-2016-103838>
- Barcenilla, A., March, L. M., Chen, J. S., & Sambrook, P. N. (2012). Carpal tunnel syndrome and its relationship to occupation: a meta-analysis. *Rheumatology (Oxford)*, *51*(2), 250-261. <https://doi.org/10.1093/rheumatology/ker108>
- Basner, M., Babisch, W., Davis, A., Brink, M., Clark, C., Janssen, S., & Stansfeld, S. (2014). Auditory and non-auditory effects of noise on health. *Lancet (London, England)*, *383*(9925), 1325-1332. [https://doi.org/10.1016/s0140-6736\(13\)61613-x](https://doi.org/10.1016/s0140-6736(13)61613-x)
- Baur, X., & Bakehe, P. (2014). Allergens causing occupational asthma: an evidence-based evaluation of the literature. *Int Arch Occup Environ Health*, *87*(4), 339-363. <https://doi.org/10.1007/s00420-013-0866-9>
- Beer, C., Kolstad, H. A., S ndergaard, K., Bendstrup, E., Heederik, D., Olsen, K. E., Omland,  ., Petsonk, E., Sigsgaard, T., Sherson, D. L., & Schl nssen, V. (2017). A systematic review of occupational exposure to coal dust and the risk of interstitial lung diseases. *Eur Clin Respir J*, *4*(1), 1264711. <https://doi.org/10.1080/20018525.2017.1264711>
- Bernal, D., Campos-Serna, J., Tobias, A., Vargas-Prada, S., Benavides, F. G., & Serra, C. (2015). Work-related psychosocial risk factors and musculoskeletal disorders in hospital nurses and nursing aides: a systematic review and meta-analysis. *Int J Nurs Stud*, *52*(2), 635-648. <https://doi.org/10.1016/j.ijnurstu.2014.11.003>
- Bernstein, J. A., Dumas, O., de Blay, F., Ederl , C., & Malo, J.-L. (2021). Irritant-Induced Asthma and Reactive Airways Dysfunction Syndrome. In *Asthma in the Workplace, 5th edition* (pp. 251-260). CRC Press.
- Blanc, P. D., Annesi-Maesano, I., Balmes, J. R., Cummings, K. J., Fishwick, D., Miedinger, D., Murgia, N., Naidoo, R. N., Reynolds, C. J., Sigsgaard, T., Tor n, K., Vinnikov, D., & Redlich, C. A. (2019). The Occupational Burden of Nonmalignant Respiratory Diseases. An Official American Thoracic Society and European Respiratory Society Statement. *Am J Respir Crit Care Med*, *199*(11), 1312-1334. <https://doi.org/10.1164/rccm.201904-0717ST>
- Bokenberger, K., S j lander, A., Dahl Aslan, A. K., Karlsson, I. K.,  kerstedt, T., & Pedersen, N. L. (2018). Shift work and risk of incident dementia: a study of two population-based cohorts. *Eur J Epidemiol*, *33*(10), 977-987. <https://doi.org/10.1007/s10654-018-0430-8>
- Bolm-Audorff, U., Hegewald, J., Pretzsch, A., Freiberg, A., Nienhaus, A., & Seidler, A. (2020). Occupational Noise and Hypertension Risk: A Systematic Review and Meta-Analysis. *Int J Environ Res Public Health*, *17*(17). <https://doi.org/10.3390/ijerph17176281>
- Borak, J. (2016). Chronic Beryllium Disease: The Search for a Dose-Response. *J Occup Environ Med*, *58*(11), e355-e361. <https://doi.org/10.1097/jom.0000000000000869>
- Boudrias, V., Tr panier, S.-G., & Salin, D. (2021). A systematic review of research on the longitudinal consequences of workplace bullying and the mechanisms involved. *Aggression and violent behavior*, *56*, 101508.
- Bovenzi, M., Schust, M., Menzel, G., Hofmann, J., & Hinz, B. (2015). A cohort study of sciatic pain and measures of internal spinal load in professional drivers. *Ergonomics*, *58*(7), 1088-1102. <https://doi.org/10.1080/00140139.2014.943302>
- Burge, P. S. (2016). Hypersensitivity Pneumonitis Due to Metalworking Fluid Aerosols. *Curr Allergy Asthma Rep*, *16*(8), 59. <https://doi.org/10.1007/s11882-016-0639-0>
- Burstr m, L., Nilsson, T., & Wahlstr m, J. (2015). Whole-body vibration and the risk of low back pain and sciatica: a systematic review and meta-analysis. *Int Arch Occup Environ Health*, *88*(4), 403-418. <https://doi.org/10.1007/s00420-014-0971-4>
- Buruck, G., Tomaschek, A., Wendsche, J., Ochsmann, E., & D rfel, D. (2019). Psychosocial areas of worklife and chronic low back pain: a systematic review and meta-analysis. *BMC Musculoskelet Disord*, *20*(1), 480. <https://doi.org/10.1186/s12891-019-2826-3>
- Campbell, P., Wynne-Jones, G., Muller, S., & Dunn, K. M. (2013). The influence of employment social support for risk and prognosis in nonspecific back pain: a systematic review and critical synthesis. *Int Arch Occup Environ Health*, *86*(2), 119-137. <https://doi.org/10.1007/s00420-012-0804-2>

- Canetti, E. F. D., Schram, B., Orr, R. M., Knapik, J., & Pope, R. (2020). Risk factors for development of lower limb osteoarthritis in physically demanding occupations: A systematic review and meta-analysis. *Appl Ergon*, 86, 103097. <https://doi.org/10.1016/j.apergo.2020.103097>
- Caporossi, L., & Papaleo, B. (2017). Bisphenol A and Metabolic Diseases: Challenges for Occupational Medicine. *Int J Environ Res Public Health*, 14(9). <https://doi.org/10.3390/ijerph14090959>
- Chen, C. J., Wang, S. L., Chiou, J. M., Tseng, C. H., Chiou, H. Y., Hsueh, Y. M., Chen, S. Y., Wu, M. M., & Lai, M. S. (2007). Arsenic and diabetes and hypertension in human populations: a review. *Toxicol Appl Pharmacol*, 222(3), 298-304. <https://doi.org/10.1016/j.taap.2006.12.032>
- Chiarella, S. E., Fernandez, R., & Avila, P. C. (2015). The genes and the environment in nasal allergy. *Curr Opin Allergy Clin Immunol*, 15(5), 440-445. <https://doi.org/10.1097/aci.0000000000000207>
- Cicero, C. E., Mostile, G., Vasta, R., Rapisarda, V., Signorelli, S. S., Ferrante, M., Zappia, M., & Nicoletti, A. (2017). Metals and neurodegenerative diseases. A systematic review. *Environ Res*, 159, 82-94. <https://doi.org/10.1016/j.envres.2017.07.048>
- Clarhed, U. K. E., Svendsen, M., Schiöler, L., Kongerud, J., Torén, K., Hellgren, J., & Fell, A. K. (2018). Chronic Rhinosinusitis Related to Occupational Exposure: The Telemark Population Study. *J Occup Environ Med*, 60(7), 656-660. <https://doi.org/10.1097/jom.0000000000001312>
- Coenen, P., van der Molen, H. F., Burdorf, A., Huysmans, M. A., Straker, L., Frings-Dresen, M. H., & van der Beek, A. J. (2019). Associations of screen work with neck and upper extremity symptoms: a systematic review with meta-analysis. *Occup Environ Med*, 76(7), 502-509. <https://doi.org/10.1136/oemed-2018-105553>
- Cook, C. E., Taylor, J., Wright, A., Milosavljevic, S., Goode, A., & Whitford, M. (2014). Risk factors for first time incidence sciatica: a systematic review. *Physiother Res Int*, 19(2), 65-78. <https://doi.org/10.1002/pri.1572>
- Cramer, C., Schlünssen, V., Bendstrup, E., Stokholm, Z. A., Vestergaard, J. M., Frydenberg, M., & Kolstad, H. A. (2016). Risk of hypersensitivity pneumonitis and interstitial lung diseases among pigeon breeders. *Eur Respir J*, 48(3), 818-825. <https://doi.org/10.1183/13993003.00376-2016>
- Cullinan, P. (2012). Occupation and chronic obstructive pulmonary disease (COPD). *British medical bulletin*, 104(1), 143-161.
- Cullinan, P., D'Souza, E., Tennant, R., & Barber, C. (2014). Lesson of the month: extrinsic allergic (bronchiolo)alveolitis and metal working fluids. *Thorax*, 69(11), 1059-1060. <https://doi.org/10.1136/thoraxjnl-2014-205251>
- Cullinan, P., Vandenplas, O., & Bernstein, D. (2020). Assessment and Management of Occupational Asthma. *J Allergy Clin Immunol Pract*, 8(10), 3264-3275. <https://doi.org/10.1016/j.jaip.2020.06.031>
- da Cunha Martins, A., Jr., Carneiro, M. F. H., Grotto, D., Adeyemi, J. A., & Barbosa, F., Jr. (2018). Arsenic, cadmium, and mercury-induced hypertension: mechanisms and epidemiological findings. *J Toxicol Environ Health B Crit Rev*, 21(2), 61-82. <https://doi.org/10.1080/10937404.2018.1432025>
- Daghagh Yazd, S., Wheeler, S. A., & Zuo, A. (2019). Key Risk Factors Affecting Farmers' Mental Health: A Systematic Review. *Int J Environ Res Public Health*, 16(23). <https://doi.org/10.3390/ijerph16234849>
- Dalbøge, A., Sherson, D., Sigsgaard, T., Ulrik, C., Meyer, H., Ebbehøj, N., & Schlünssen, V. (2020). *A reference document of the relation between potential sensitizing occupational exposures and asthma.*
- Dalbøge, A., Svendsen, S. W., Frost, P., & Andersen, J. H. (2018). Association between occupational mechanical exposures and subacromial impingement syndrome: A reference document. *Denmark: Danish Ramazzini Centre, Aarhus University Hospital.*
- Demers, P. A., DeMarini, D. M., Fent, K. W., Glass, D. C., Hansen, J., Adetona, O., Andersen, M. H., Freeman, L. E. B., Caban-Martinez, A. J., Daniels, R. D., Driscoll, T. R., Goodrich, J. M., Graber, J. M., Kirkham, T. L., Kjaerheim, K., Kriebel, D., Long, A. S., Main, L. C., Oliveira, M., Peters, S., Teras, L. R., Watkins, E. R., Burgess, J. L., Stec, A. A., White, P. A., DeBono, N. L., Benbrahim-Tallaa, L., de Conti, A., El Ghissassi, F., Grosse, Y., Stayner, L. T., Suonio, E., Viegas, S., Wedekind, R., Boucheron, P., Hosseini, B., Kim, J., Zahed, H., Mattock, H., Madia, F., & Schubauer-Berigan, M. K. (2022). Carcinogenicity of occupational exposure as a firefighter. *Lancet Oncol*. [https://doi.org/10.1016/s1470-2045\(22\)00390-4](https://doi.org/10.1016/s1470-2045(22)00390-4)
- Deng, N., Kohn, T. P., Lipshultz, L. I., & Pastuszak, A. W. (2018). The Relationship Between Shift Work and Men's Health. *Sex Med Rev*, 6(3), 446-456. <https://doi.org/10.1016/j.sxmr.2017.11.009>

- Descatha, A., Sembajwe, G., Pega, F., Ujita, Y., Baer, M., Boccuni, F., Di Tecco, C., Duret, C., Evanoff, B. A., Gagliardi, D., Godderis, L., Kang, S. K., Kim, B. J., Li, J., Magnusson Hanson, L. L., Marinaccio, A., Ozguler, A., Pachito, D., Pell, J., Pico, F., Ronchetti, M., Roquelaure, Y., Rugulies, R., Schouteden, M., Siegrist, J., Tsutsumi, A., & Iavicoli, S. (2020). The effect of exposure to long working hours on stroke: A systematic review and meta-analysis from the WHO/ILO Joint Estimates of the Work-related Burden of Disease and Injury. *Environ Int*, *142*, 105746. <https://doi.org/10.1016/j.envint.2020.105746>
- Dumas, O., Varraso, R., Boggs, K. M., Quinot, C., Zock, J. P., Henneberger, P. K., Speizer, F. E., Le Moual, N., & Camargo, C. A., Jr. (2019). Association of Occupational Exposure to Disinfectants With Incidence of Chronic Obstructive Pulmonary Disease Among US Female Nurses. *JAMA Netw Open*, *2*(10), e1913563. <https://doi.org/10.1001/jamanetworkopen.2019.13563>
- Esquirol, Y., Perret, B., Ruidavets, J. B., Marquie, J. C., Dienne, E., Niezborala, M., & Ferrieres, J. (2011). Shift work and cardiovascular risk factors: new knowledge from the past decade. *Arch Cardiovasc Dis*, *104*(12), 636-668. <https://doi.org/10.1016/j.acvd.2011.09.004>
- Eze, I. C., Hemkens, L. G., Bucher, H. C., Hoffmann, B., Schindler, C., Künzli, N., Schikowski, T., & Probst-Hensch, N. M. (2015). Association between ambient air pollution and diabetes mellitus in Europe and North America: systematic review and meta-analysis. *Environ Health Perspect*, *123*(5), 381-389. <https://doi.org/10.1289/ehp.1307823>
- Fang, S. C., Cassidy, A., & Christiani, D. C. (2010). A systematic review of occupational exposure to particulate matter and cardiovascular disease. *Int J Environ Res Public Health*, *7*(4), 1773-1806. <https://doi.org/10.3390/ijerph7041773>
- Fell, A. K. M., Aasen, T. O. B., & Kongerud, J. (2014). Work-related COPD. *Tidsskrift for Den norske legeförening*.
- Fontana, L., Lee, S. J., Capitanelli, I., Re, A., Maniscalco, M., Mauriello, M. C., & Iavicoli, I. (2017). Chronic Obstructive Pulmonary Disease in Farmers: A Systematic Review. *J Occup Environ Med*, *59*(8), 775-788. <https://doi.org/10.1097/jom.0000000000001072>
- Freire, C., & Koifman, S. (2013). Pesticides, depression and suicide: a systematic review of the epidemiological evidence. *Int J Hyg Environ Health*, *216*(4), 445-460. <https://doi.org/10.1016/j.ijheh.2012.12.003>
- Fu, P., Guo, X., Cheung, F. M. H., & Yung, K. K. L. (2019). The association between PM(2.5) exposure and neurological disorders: A systematic review and meta-analysis. *Sci Total Environ*, *655*, 1240-1248. <https://doi.org/10.1016/j.scitotenv.2018.11.218>
- Fuertes, E., & Brauer, M. (2020). The outdoor environment. In J. Feary, H. Suojalehto, & P. Cullinan (Eds.), *Occupational and Environmental Lung Disease* (pp. 301–316 ). European Respiratory Society.
- Gallagher, C. M., & Meliker, J. R. (2010). Blood and urine cadmium, blood pressure, and hypertension: a systematic review and meta-analysis. *Environ Health Perspect*, *118*(12), 1676-1684. <https://doi.org/10.1289/ehp.1002077>
- Gallo, V., Vanacore, N., Bueno-de-Mesquita, H. B., Vermeulen, R., Brayne, C., Pearce, N., Wark, P. A., Ward, H. A., Ferrari, P., Jenab, M., Andersen, P. M., Wennberg, P., Wareham, N., Katzke, V., Kaaks, R., Weiderpass, E., Peeters, P. H., Mattiello, A., Pala, V., Barricante, A., Chirlaque, M. D., Travier, N., Travis, R. C., Sanchez, M. J., Pessah-Rasmussen, H., Petersson, J., Tjønneland, A., Tumino, R., Quiros, J. R., Trichopoulou, A., Kyrozi, A., Oikonomidou, D., Masala, G., Sacerdote, C., Arriola, L., Boeing, H., Vigl, M., Claver-Chapelon, F., Middleton, L., Riboli, E., & Vineis, P. (2016). Physical activity and risk of Amyotrophic Lateral Sclerosis in a prospective cohort study. *Eur J Epidemiol*, *31*(3), 255-266. <https://doi.org/10.1007/s10654-016-0119-9>
- Geramas, I., Terzakis, D., Hatzimanolis, E., & Georgalas, C. (2018). Social Factors in the Development of Chronic Rhinosinusitis: a Systematic Review. *Curr Allergy Asthma Rep*, *18*(2), 7. <https://doi.org/10.1007/s11882-018-0763-0>
- Gerfaud-Valentin, M., Reboux, G., Traclat, J., Thivolet-Béjui, F., Cordier, J. F., & Cottin, V. (2014). Occupational hypersensitivity pneumonitis in a baker: a new cause. *Chest*, *145*(4), 856-858. <https://doi.org/10.1378/chest.13-1734>
- Gignac, M. A. M., Irvin, E., Cullen, K., Van Eerd, D., Beaton, D. E., Mahood, Q., McLeod, C., & Backman, C. L. (2020). Men and Women's Occupational Activities and the Risk of Developing Osteoarthritis of the Knee, Hip, or Hands: A Systematic Review and Recommendations for Future Research. *Arthritis Care Res (Hoboken)*, *72*(3), 378-396. <https://doi.org/10.1002/acr.23855>

- Gilbert-Ouimet, M., Trudel, X., Brisson, C., Milot, A., & Vézina, M. (2014). Adverse effects of psychosocial work factors on blood pressure: systematic review of studies on demand-control-support and effort-reward imbalance models. *Scand J Work Environ Health*, *40*(2), 109-132. <https://doi.org/10.5271/sjweh.3390>
- Goldman, S. M., Quinlan, P. J., Ross, G. W., Marras, C., Meng, C., Bhudhikanok, G. S., Comyns, K., Korell, M., Chade, A. R., Kasten, M., Priestley, B., Chou, K. L., Fernandez, H. H., Cambi, F., Langston, J. W., & Tanner, C. M. (2012). Solvent exposures and Parkinson disease risk in twins. *Ann Neurol*, *71*(6), 776-784. <https://doi.org/10.1002/ana.22629>
- Gonick, H. C., & Behari, J. R. (2002). Is lead exposure the principal cause of essential hypertension? *Med Hypotheses*, *59*(3), 239-246. [https://doi.org/10.1016/s0306-9877\(02\)00207-4](https://doi.org/10.1016/s0306-9877(02)00207-4)
- Guillien, A., Soumagne, T., Dalphin, J. C., & Degano, B. (2019). COPD, airflow limitation and chronic bronchitis in farmers: a systematic review and meta-analysis. *Occup Environ Med*, *76*(1), 58-68. <https://doi.org/10.1136/oemed-2018-105310>
- Gunnarsson, L. G., & Bodin, L. (2017). Parkinson's disease and occupational exposures: a systematic literature review and meta-analyses. *Scand J Work Environ Health*, *43*(3), 197-209. <https://doi.org/10.5271/sjweh.3641>
- Gunnarsson, L. G., & Bodin, L. (2018). Amyotrophic Lateral Sclerosis and Occupational Exposures: A Systematic Literature Review and Meta-Analyses. *Int J Environ Res Public Health*, *15*(11). <https://doi.org/10.3390/ijerph15112371>
- Gunnarsson, L. G., & Bodin, L. (2019). Occupational Exposures and Neurodegenerative Diseases-A Systematic Literature Review and Meta-Analyses. *Int J Environ Res Public Health*, *16*(3). <https://doi.org/10.3390/ijerph16030337>
- Gustavsen, S., Søndergaard, H.B., Oturai, D.B., Laursen, B. Laursen, J.H., Magyari, M., Ullum, H., Larsen, M.H., Selleberg, F., & Oturai, A.B. (2016). Shift work at young age is associated with increased risk of multiple sclerosis in a Danish population. *Multiple Sclerosis and Related Disorders*, *9*, 104-109. <https://doi.org/10.1016/j.msard.2016.06.010>
- Gustavsson, P., Sjögren, B., Broberg, K., & Albin, M. (2019). Common occupational chemical exposures. In K. Leander (Ed.), *Environmental Exposures and Cardiovascular Disease* (Vol. IMM report 2019/1). Institute of Environmental Medicine, Karolinska Institutet.
- Hammer, P. E., Shiri, R., Kryger, A. I., Kirkeskov, L., & Bonde, J. P. (2014). Associations of work activities requiring pinch or hand grip or exposure to hand-arm vibration with finger and wrist osteoarthritis: a meta-analysis. *Scand J Work Environ Health*, *40*(2), 133-145. <https://doi.org/10.5271/sjweh.3409>
- Harris, M. A., Shen, H., Marion, S. A., Tsui, J. K., & Teschke, K. (2013). Head injuries and Parkinson's disease in a case-control study. *Occup Environ Med*, *70*(12), 839-844. <https://doi.org/10.1136/oemed-2013-101444>
- Hedström, A. K., Hössjer, O., Katsoulis, M., Kockum, I., Olsson, T., & Alfredsson, L. (2018). Organic solvents and MS susceptibility: Interaction with MS risk HLA genes. *Neurology*, *91*(5), e455-e462. <https://doi.org/10.1212/wnl.0000000000005906>
- Hedström, A. K., Åkerstedt, T., Olsson, T., & Alfredsson, L. (2015). Shift work influences multiple sclerosis risk. *Mult Scler*, *21*(9), 1195-9. <https://doi.org/10.1177/1352458514563592>
- Hellgren, J. (2008). Occupational rhinosinusitis. *Curr Allergy Asthma Rep*, *8*(3), 234-239. <https://doi.org/10.1007/s11882-008-0039-1>
- Henneberger, P. K., Redlich, C. A., Callahan, D. B., Harber, P., Lemièrre, C., Martin, J., Tarlo, S. M., Vandenplas, O., & Torén, K. (2011). An official american thoracic society statement: work-exacerbated asthma. *Am J Respir Crit Care Med*, *184*(3), 368-378. <https://doi.org/10.1164/rccm.812011ST>
- Holtermann, A., Krause, N., van der Beek, A. J., & Straker, L. (2018). The physical activity paradox: six reasons why occupational physical activity (OPA) does not confer the cardiovascular health benefits that leisure time physical activity does. *Br J Sports Med*, *52*(3), 149-150. <https://doi.org/10.1136/bjsports-2017-097965>
- Hoogendoorn, W. E., van Poppel, M. N., Bongers, P. M., Koes, B. W., & Bouter, L. M. (1999). Physical load during work and leisure time as risk factors for back pain. *Scand J Work Environ Health*, *25*(5), 387-403. <https://doi.org/10.5271/sjweh.451>
- Hu, X. F., Lowe, M., & Chan, H. M. (2021). Mercury exposure, cardiovascular disease, and mortality: A systematic review and dose-response meta-analysis. *Environ Res*, *193*, 110538. <https://doi.org/10.1016/j.envres.2020.110538>



- Huang, L., Zhang, Y., Wang, Y., & Lan, Y. (2021). Relationship Between Chronic Noise Exposure, Cognitive Impairment, and Degenerative Dementia: Update on the Experimental and Epidemiological Evidence and Prospects for Further Research. *J Alzheimers Dis*, 79(4), 1409-1427. <https://doi.org/10.3233/jad-201037>
- Huntley C.C., Patel K., Mughal A.Z., Coelho S., Burge P.S., Turner A.M. & Walters G.I. (2022) Airborne occupational exposures associated with pulmonary sarcoidosis: a systematic review and meta-analysis. 80(10) 580-9. <http://dx.doi.org/10.1136/oemed-2022-108632>
- Huss, A., Koeman, T., Kromhout, H., & Vermeulen, R. (2015). Extremely Low Frequency Magnetic Field Exposure and Parkinson's Disease--A Systematic Review and Meta-Analysis of the Data. *Int J Environ Res Public Health*, 12(7), 7348-7356. <https://doi.org/10.3390/ijerph120707348>
- Huss, A., Peters, S., & Vermeulen, R. (2018). Occupational exposure to extremely low-frequency magnetic fields and the risk of ALS: A systematic review and meta-analysis. *Bioelectromagnetics*, 39(2), 156-163. <https://doi.org/10.1002/bem.22104>
- Hünefeld, L., Gerstenberg, S., & Hüffmeier, J. (2020). Job satisfaction and mental health of temporary agency workers in Europe: a systematic review and research agenda. *Work & Stress*, 34(1), 82-110.
- IARC. Monographs available: International Agency for Research on Cancer (IARC); n.d. [Available from: <https://monographs.iarc.who.int/monographs-available/> accessed 13.12.2023
- Inan-Eroglu, E., & Ayaz, A. (2018). Is aluminum exposure a risk factor for neurological disorders? *J Res Med Sci*, 23, 51. [https://doi.org/10.4103/jrms.JRMS\\_921\\_17](https://doi.org/10.4103/jrms.JRMS_921_17)
- Ishizuka, M., Miyazaki, Y., Tateishi, T., Tsutsui, T., Tsuchiya, K., & Inase, N. (2015). Validation of inhalation provocation test in chronic bird-related hypersensitivity pneumonitis and new prediction score. *Ann Am Thorac Soc*, 12(2), 167-173. <https://doi.org/10.1513/AnnalsATS.201408-350OC>
- Jahn A., Andersen J.H., Christiansen D.H., Seidler A. & Dalbøge A. (2023) Occupational mechanical exposures as risk factor for chronic low-back pain: a systematic review and meta-analysis. *Scand J Work Environ Health*. 49(7):453-465. <https://doi.org/10.5271/sjweh.4114>
- Khan, N., Kennedy, A., Cotton, J., & Brumby, S. (2019). A Pest to Mental Health? Exploring the Link between Exposure to Agrichemicals in Farmers and Mental Health. *Int J Environ Res Public Health*, 16(8). <https://doi.org/10.3390/ijerph16081327>
- Kilian, J., & Kitazawa, M. (2018). The emerging risk of exposure to air pollution on cognitive decline and Alzheimer's disease - Evidence from epidemiological and animal studies. *Biomed J*, 41(3), 141-162. <https://doi.org/10.1016/j.bj.2018.06.001>
- Killin, L. O., Starr, J. M., Shiue, I. J., & Russ, T. C. (2016). Environmental risk factors for dementia: a systematic review. *BMC Geriatr*, 16(1), 175. <https://doi.org/10.1186/s12877-016-0342-y>
- Kim, T. J., & von dem Knesebeck, O. (2016). Perceived job insecurity, unemployment and depressive symptoms: a systematic review and meta-analysis of prospective observational studies. *Int Arch Occup Environ Health*, 89(4), 561-573. <https://doi.org/10.1007/s00420-015-1107-1>
- Kivimäki, M., Jokela, M., Nyberg, S. T., Singh-Manoux, A., Fransson, E. I., Alfredsson, L., Bjorner, J. B., Borritz, M., Burr, H., Casini, A., Clays, E., De Bacquer, D., Dragano, N., Erbel, R., Geuskens, G. A., Hamer, M., Hoofman, W. E., Houtman, I. L., Jöckel, K. H., Kittel, F., Knutsson, A., Koskenvuo, M., Lunau, T., Madsen, I. E., Nielsen, M. L., Nordin, M., Oksanen, T., Pejtersen, J. H., Pentti, J., Rugulies, R., Salo, P., Shipley, M. J., Siegrist, J., Steptoe, A., Suominen, S. B., Theorell, T., Vahtera, J., Westerholm, P. J., Westerlund, H., O'Reilly, D., Kumari, M., Batty, G. D., Ferrie, J. E., & Virtanen, M. (2015a). Long working hours and risk of coronary heart disease and stroke: a systematic review and meta-analysis of published and unpublished data for 603,838 individuals. *Lancet (London, England)*, 386(10005), 1739-1746. [https://doi.org/10.1016/s0140-6736\(15\)60295-1](https://doi.org/10.1016/s0140-6736(15)60295-1)
- Kivimäki, M., Singh-Manoux, A., Nyberg, S., Jokela, M., & Virtanen, M. (2015b). Job strain and risk of obesity: systematic review and meta-analysis of cohort studies. *Int J Obes (Lond)*, 39(11), 1597-1600. <https://doi.org/10.1038/ijo.2015.103>
- Knutsson, A., & Bøggild, H. (2000). Shiftwork and cardiovascular disease: review of disease mechanisms. *Rev Environ Health*, 15(4), 359-372. <https://doi.org/10.1515/reveh.2000.15.4.359>
- Koeman, T., Schouten, L. J., van den Brandt, P. A., Slottje, P., Huss, A., Peters, S., Kromhout, H., & Vermeulen, R. (2015). Occupational exposures and risk of dementia-related mortality in the prospective Netherlands Cohort Study. *Am J Ind Med*, 58(6), 625-635. <https://doi.org/10.1002/ajim.22462>

- Kongsupon, N., Walters, G. I., & Sathra, S. S. (2021). Occupational causes of hypersensitivity pneumonitis: a systematic review and compendium. *Occup Med (Lond)*, 71(6-7), 255-259. <https://doi.org/10.1093/occmed/kqab082>
- Kozak, A., Schedlbauer, G., Wirth, T., Euler, U., Westermann, C., & Nienhaus, A. (2015). Association between work-related biomechanical risk factors and the occurrence of carpal tunnel syndrome: an overview of systematic reviews and a meta-analysis of current research. *BMC Musculoskelet Disord*, 16, 231. <https://doi.org/10.1186/s12891-015-0685-0>
- Kuijer, P., Verbeek, J. H., Seidler, A., Ellegast, R., Hulshof, C. T. J., Frings-Dresen, M. H. W., & Van der Molen, H. F. (2018). Work-relatedness of lumbosacral radiculopathy syndrome: Review and dose-response meta-analysis. *Neurology*, 91(12), 558-564. <https://doi.org/10.1212/01.wnl.0000544322.26939.09>
- Lang, J., Ochsmann, E., Kraus, T., & Lang, J. W. (2012). Psychosocial work stressors as antecedents of musculoskeletal problems: a systematic review and meta-analysis of stability-adjusted longitudinal studies. *Soc Sci Med*, 75(7), 1163-1174. <https://doi.org/10.1016/j.socscimed.2012.04.015>
- Lapko, I. V., Kir'yakov, V. A., Pavlovskaya, N. A., Antoshina, L. I., & Oshkoderov, O. A. (2017). Influence of occupational vibration on development of resistance to insuline and of II type diabetes mellitus. *Med Tr Prom Ekol*(2), 30-33.
- Leach, L. S., Poyser, C., & Butterworth, P. (2017). Workplace bullying and the association with suicidal ideation/thoughts and behaviour: a systematic review. *Occup Environ Med*, 74(1), 72-79. <https://doi.org/10.1136/oemed-2016-103726>
- Lee, A., Myung, S. K., Cho, J. J., Jung, Y. J., Yoon, J. L., & Kim, M. Y. (2017). Night Shift Work and Risk of Depression: Meta-analysis of Observational Studies. *J Korean Med Sci*, 32(7), 1091-1096. <https://doi.org/10.3346/jkms.2017.32.7.1091>
- Li, J., Loerbroks, A., & Angerer, P. (2013). Physical activity and risk of cardiovascular disease: what does the new epidemiological evidence show? *Curr Opin Cardiol*, 28(5), 575-583. <https://doi.org/10.1097/HCO.0b013e328364289c>
- Li, M., Huang, J. T., Tan, Y., Yang, B. P., & Tang, Z. Y. (2016). Shift work and risk of stroke: A meta-analysis. *Int J Cardiol*, 214, 370-373. <https://doi.org/10.1016/j.ijcard.2016.03.052>
- Li, W., Ruan, W., Chen, Z., Yi, G., Lu, Z., & Wang, D. (2021). A meta-analysis of observational studies including dose-response relationship between long working hours and risk of obesity. *Rev Endocr Metab Disord*, 22(4), 837-845. <https://doi.org/10.1007/s11154-021-09643-3>
- Lissåker, C. T., Gustavsson, P., Albin, M., Ljungman, P., Bodin, T., Sjöström, M., & Selander, J. (2021). Occupational exposure to noise in relation to pregnancy-related hypertensive disorders and diabetes. *Scand J Work Environ Health*, 47(1), 33-41. <https://doi.org/10.5271/sjweh.3913>
- Liu, B., Feng, W., Wang, J., Li, Y., Han, X., Hu, H., Guo, H., Zhang, X., & He, M. (2016). Association of urinary metals levels with type 2 diabetes risk in coke oven workers. *Environ Pollut*, 210, 1-8. <https://doi.org/10.1016/j.envpol.2015.11.046>
- Loomis, D., Guha, N., Hall, A. L., & Straif, K. (2018). Identifying occupational carcinogens: an update from the IARC Monographs. *Occup Environ Med*, 75(8), 593-603. <https://doi.org/10.1136/oemed-2017-104944>
- Lötters, F., Burdorf, A., Kuiper, J., & Miedema, H. (2003). Model for the work-relatedness of low-back pain. *Scand J Work Environ Health*, 29(6), 431-440. <https://doi.org/10.5271/sjweh.749>
- MacMurdo, M. G., Mroz, M. M., Culver, D. A., Dweik, R. A., & Maier, L. A. (2020). Chronic Beryllium Disease: Update on a Moving Target. *Chest*, 158(6), 2458-2466. <https://doi.org/10.1016/j.chest.2020.07.074>
- Madsen, I. E. H., Nyberg, S. T., Magnusson Hanson, L. L., Ferrie, J. E., Ahola, K., Alfredsson, L., Batty, G. D., Bjorner, J. B., Borritz, M., Burr, H., Chastang, J. F., de Graaf, R., Dragano, N., Hamer, M., Jokela, M., Knutsson, A., Koskenvuo, M., Koskinen, A., Leineweber, C., Niedhammer, I., Nielsen, M. L., Nordin, M., Oksanen, T., Pejtersen, J. H., Pentti, J., Plaisier, I., Salo, P., Singh-Manoux, A., Suominen, S., Ten Have, M., Theorell, T., Toppinen-Tanner, S., Vahtera, J., Väänänen, A., Westerholm, P. J. M., Westerlund, H., Fransson, E. I., Heikkilä, K., Virtanen, M., Rugulies, R., & Kivimäki, M. (2017). Job strain as a risk factor for clinical depression: systematic review and meta-analysis with additional individual participant data. *Psychol Med*, 47(8), 1342-1356. <https://doi.org/10.1017/s003329171600355x>
- Maestrelli, P., Henneberger, P. K., Tarlo, S., Mason, P., & Boschetto, P. (2020). Causes and Phenotypes of Work-Related Asthma. *Int J Environ Res Public Health*, 17(13). <https://doi.org/10.3390/ijerph17134713>

- Malmström, K., Savolainen, J., & Terho, E. O. (1999). Allergic alveolitis from pine sawdust. *Allergy*, *54*(5), 532-533. <https://doi.org/10.1034/j.1398-9995.1999.00034.x>
- Manohar, S., Thongprayoon, C., Cheungpasitporn, W., Mao, M. A., & Herrmann, S. M. (2017). Associations of rotational shift work and night shift status with hypertension: a systematic review and meta-analysis. *J Hypertens*, *35*(10), 1929-1937. <https://doi.org/10.1097/hjh.0000000000001442>
- Mansfield, M., Thacker, M., & Sandford, F. (2018). Psychosocial Risk Factors and the Association With Carpal Tunnel Syndrome: A Systematic Review. *Hand (N Y)*, *13*(5), 501-508. <https://doi.org/10.1177/1558944717736398>
- Marant Micallef, C., Shield, K. D., Baldi, I., Charbotel, B., Fervers, B., Gilg Soit Ilg, A., Guénel, P., Olsson, A., Rushton, L., Hutchings, S. J., Straif, K., & Soerjomataram, I. (2018). Occupational exposures and cancer: a review of agents and relative risk estimates. *Occup Environ Med*, *75*(8), 604-614. <https://doi.org/10.1136/oemed-2017-104858>
- Martino, R., Candundo, H., Lieshout, P. V., Shin, S., Crispo, J. A. G., & Barakat-Haddad, C. (2017). Onset and progression factors in Parkinson's disease: A systematic review. *Neurotoxicology*, *61*, 132-141. <https://doi.org/10.1016/j.neuro.2016.04.003>
- McCunney, R. J., Morfeld, P., & Payne, S. (2009). What component of coal causes coal workers' pneumoconiosis? *J Occup Environ Med*, *51*(4), 462-471. <https://doi.org/10.1097/JOM.0b013e3181a01ada>
- Meca-Lallana, V., Berenguer-Ruiz, L., Carreres-Polo, J., Eichau-Madueño, S., Ferrer-Lozano, J., Forero, L., Higuera, Y., Téllez Lara, N., Vidal-Jordana, A., & Pérez-Miralles, F. C. (2021). Deciphering Multiple Sclerosis Progression. *Front Neurol*, *12*, 608491. <https://doi.org/10.3389/fneur.2021.608491>
- Mediouni, Z., de Roquemaurel, A., Dumontier, C., Becour, B., Garrabe, H., Roquelaure, Y., & Descatha, A. (2014). Is carpal tunnel syndrome related to computer exposure at work? A review and meta-analysis. *J Occup Environ Med*, *56*(2), 204-208. <https://doi.org/10.1097/jom.0000000000000080>
- Meyer, K. C., Sharma, B., Kaufmann, B., Kupper, A., & Hodgson, M. (2018). Lung disease associated with occupational styrene exposure. *Am J Ind Med*. <https://doi.org/10.1002/ajim.22867>
- Mikkelsen, S., Coggon, D., Andersen, J. H., Casey, P., Flachs, E. M., Kolstad, H. A., Mors, O., & Bonde, J. P. (2021). Are depressive disorders caused by psychosocial stressors at work? A systematic review with metaanalysis. *Eur J Epidemiol*, *36*(5), 479-496. <https://doi.org/10.1007/s10654-021-00725-9>
- Milner, A., Witt, K., LaMontagne, A. D., & Niedhammer, I. (2018). Psychosocial job stressors and suicidality: a meta-analysis and systematic review. *Occup Environ Med*, *75*(4), 245-253. <https://doi.org/10.1136/oemed-2017-104531>
- Min, J. Y., & Min, K. B. (2016). Blood cadmium levels and Alzheimer's disease mortality risk in older US adults. *Environ Health*, *15*(1), 69. <https://doi.org/10.1186/s12940-016-0155-7>
- Morell, F., Roger, À., Reyes, L., Cruz, M. J., Murio, C., & Muñoz, X. (2008). Bird fancier's lung: a series of 86 patients. *Medicine (Baltimore)*, *87*(2), 110-130. <https://doi.org/10.1097/MD.0b013e31816d1dda>
- Morell, F., Villar, A., Ojanguren, I., Muñoz, X., Cruz, M. J., Sansano, I., Ramon, M. A., & Raghu, G. (2021). Hypersensitivity Pneumonitis and (Idiopathic) Pulmonary Fibrosis Due to Feather Duvets and Pillows. *Arch Bronconeumol (Engl Ed)*, *57*(2), 87-93. <https://doi.org/10.1016/j.arbres.2019.12.003>
- Mäkinen, T. M., & Hassi, J. (2009). Health problems in cold work. *Ind Health*, *47*(3), 207-220. <https://doi.org/10.2486/indhealth.47.207>
- Nabe-Nielsen, K., Hansen Å, M., Ishtiak-Ahmed, K., Grynderup, M. B., Gyntelberg, F., Islamoska, S., Mortensen, E. L., Phung, T. K. T., Rod, N. H., Waldemar, G., Westendorp, R. G. J., & Garde, A. H. (2019). Night shift work, long working hours and dementia: a longitudinal study of the Danish Work Environment Cohort Study. *BMJ Open*, *9*(5), e027027. <https://doi.org/10.1136/bmjopen-2018-027027>
- Navas-Acien, A., Guallar, E., Silbergeld, E. K., & Rothenberg, S. J. (2007). Lead exposure and cardiovascular disease--a systematic review. *Environ Health Perspect*, *115*(3), 472-482. <https://doi.org/10.1289/ehp.9785>
- NEG (2020) The Nordic Expert Group for Criteria Documentation of Health Risks from Chemicals. 153. Occupational chemical exposures and cardiovascular disease (gu.se)
- Nicholson, P. J., Cullinan, P., Taylor, A. J., Burge, P. S., & Boyle, C. (2005). Evidence based guidelines for the prevention, identification, and management of occupational asthma. *Occup Environ Med*, *62*(5), 290-299. <https://doi.org/10.1136/oem.2004.016287>

- Niedhammer, I., Bertrais, S., & Witt, K. (2021). Psychosocial work exposures and health outcomes: a meta-review of 72 literature reviews with meta-analysis. *Scand J Work Environ Health*, 47(7), 489-508. <https://doi.org/10.5271/sjweh.3968>
- Nilsson, T., Wahlström, J., & Burström, L. (2017). Hand-arm vibration and the risk of vascular and neurological diseases-A systematic review and meta-analysis. *PLoS One*, 12(7), e0180795. <https://doi.org/10.1371/journal.pone.0180795>
- Nyberg, S. T., Fransson, E. I., Heikkilä, K., Alfredsson, L., Casini, A., Clays, E., De Bacquer, D., Dragano, N., Erbel, R., Ferrie, J. E., Hamer, M., Jöckel, K. H., Kittel, F., Knutsson, A., Ladwig, K. H., Lunau, T., Marmot, M. G., Nordin, M., Rugulies, R., Siegrist, J., Steptoe, A., Westerholm, P. J., Westerlund, H., Theorell, T., Brunner, E. J., Singh-Manoux, A., Batty, G. D., & Kivimäki, M. (2013). Job strain and cardiovascular disease risk factors: meta-analysis of individual-participant data from 47,000 men and women. *PLoS One*, 8(6), e67323. <https://doi.org/10.1371/journal.pone.0067323>
- Nyberg, S. T., Heikkilä, K., Fransson, E. I., Alfredsson, L., De Bacquer, D., Bjorner, J. B., Bonenfant, S., Borritz, M., Burr, H., Casini, A., Clays, E., Dragano, N., Erbel, R., Geuskens, G. A., Goldberg, M., Hoofman, W. E., Houtman, I. L., Jöckel, K. H., Kittel, F., Knutsson, A., Koskenvuo, M., Leineweber, C., Lunau, T., Madsen, I. E., Hanson, L. L., Marmot, M. G., Nielsen, M. L., Nordin, M., Oksanen, T., Pentti, J., Rugulies, R., Siegrist, J., Suominen, S., Vahtera, J., Virtanen, M., Westerholm, P., Westerlund, H., Zins, M., Ferrie, J. E., Theorell, T., Steptoe, A., Hamer, M., Singh-Manoux, A., Batty, G. D., & Kivimäki, M. (2012). Job strain in relation to body mass index: pooled analysis of 160 000 adults from 13 cohort studies. *J Intern Med*, 272(1), 65-73. <https://doi.org/10.1111/j.1365-2796.2011.02482.x>
- Omland, Ø., Würtz, E. T., Aasen, T. B., Blanc, P., Brisman, J. B., Miller, M. R., Pedersen, O. F., Schlünssen, V., Sigsgaard, T., Ulrik, C. S., & Viskum, S. (2014). Occupational chronic obstructive pulmonary disease: a systematic literature review. *Scand J Work Environ Health*, 40(1), 19-35. <https://doi.org/10.5271/sjweh.3400>
- Overgaard, D., Gyntelberg, F., & Heitmann, B. L. (2004). Psychological workload and body weight: is there an association? A review of the literature. *Occup Med (Lond)*, 54(1), 35-41. <https://doi.org/10.1093/occmed/kqg135>
- Pacheco, E., Bártolo, A., Rodrigues, F., Pereira, A., Duarte, J. C., & Silva, C. F. (2021). Impact of Psychological Aggression at the Workplace on Employees' Health: A Systematic Review of Personal Outcomes and Prevention Strategies. *Psychol Rep*, 124(3), 929-976. <https://doi.org/10.1177/0033294119875598>
- Palin, O., Herd, C., Morrison, K. E., Jagielski, A. C., Wheatley, K., Thomas, G. N., & Clarke, C. E. (2015). Systematic review and meta-analysis of hydrocarbon exposure and the risk of Parkinson's disease. *Parkinsonism Relat Disord*, 21(3), 243-248. <https://doi.org/10.1016/j.parkreldis.2014.12.017>
- Palmer, K. T., Harris, E. C., & Coggon, D. (2007). Carpal tunnel syndrome and its relation to occupation: a systematic literature review. *Occup Med (Lond)*, 57(1), 57-66. <https://doi.org/10.1093/occmed/kql125>
- Park, R. M. (2013). Neurobehavioral deficits and parkinsonism in occupations with manganese exposure: a review of methodological issues in the epidemiological literature. *Saf Health Work*, 4(3), 123-135. <https://doi.org/10.1016/j.shaw.2013.07.003>
- Peng, Q., Bakulski, K. M., Nan, B., & Park, S. K. (2017). Cadmium and Alzheimer's disease mortality in U.S. adults: Updated evidence with a urinary biomarker and extended follow-up time. *Environ Res*, 157, 44-51. <https://doi.org/10.1016/j.envres.2017.05.011>
- Pepys, J., & Jenkins, P. A. (1965). PRECIPITIN (F.L.H.) TEST IN FARMER'S LUNG. *Thorax*, 20(1), 21-35. <https://doi.org/10.1136/thx.20.1.21>
- Peters, S., Broberg, K., Gallo, V., Levi, M., Kippler, M., Vineis, P., Veldink, J., van den Berg, L., Middleton, L., Travis, R. C., Bergmann, M. M., Palli, D., Grioni, S., Tumino, R., Elbaz, A., Vlaar, T., Mancini, F., Kühn, T., Katzke, V., Agudo, A., Goñi, F., Gómez, J. H., Rodríguez-Barranco, M., Merino, S., Barricarte, A., Trichopoulou, A., Jenab, M., Weiderpass, E., & Vermeulen, R. (2021). Blood Metal Levels and Amyotrophic Lateral Sclerosis Risk: A Prospective Cohort. *Ann Neurol*, 89(1), 125-133. <https://doi.org/10.1002/ana.25932>
- Peters, S., Visser, A. E., D'Ovidio, F., Beghi, E., Chiò, A., Logroscino, G., Hardiman, O., Kromhout, H., Huss, A., Veldink, J., Vermeulen, R., & van den Berg, L. H. (2019). Associations of Electric Shock and Extremely Low-Frequency Magnetic Field Exposure With the Risk of Amyotrophic Lateral Sclerosis. *Am J Epidemiol*, 188(4), 796-805. <https://doi.org/10.1093/aje/kwy287>
- Pourhassan, B., Meysamie, A., Alizadeh, S., Habibian, A., & Beigzadeh, Z. (2019). Risk of obstructive pulmonary diseases and occupational exposure to pesticides: a systematic review and meta-analysis. *Public Health*, 174, 31-41. <https://doi.org/10.1016/j.puhe.2019.05.024>

- Proper, K. I., van de Langenberg, D., Rodenburg, W., Vermeulen, R. C. H., van der Beek, A. J., van Steeg, H., & van Kerkhof, L. W. M. (2016). The Relationship Between Shift Work and Metabolic Risk Factors: A Systematic Review of Longitudinal Studies. *Am J Prev Med*, *50*(5), e147-e157. <https://doi.org/10.1016/j.amepre.2015.11.013>
- Radon, K., Gerhardinger, U., Schulze, A., Zock, J. P., Norback, D., Toren, K., Jarvis, D., Held, L., Heinrich, J., Leynaert, B., Nowak, D., & Kogevinas, M. (2008). Occupation and adult onset of rhinitis in the general population. *Occup Environ Med*, *65*(1), 38-43. <https://doi.org/10.1136/oem.2006.031542>
- Rana, S. V. (2014). Perspectives in endocrine toxicity of heavy metals--a review. *Biol Trace Elem Res*, *160*(1), 1-14. <https://doi.org/10.1007/s12011-014-0023-7>
- Reed, D. B., & Claunch, D. T. (2020). Risk for Depressive Symptoms and Suicide Among U.S. Primary Farmers and Family Members: A Systematic Literature Review. *Workplace Health Saf*, *68*(5), 236-248. <https://doi.org/10.1177/2165079919888940>
- Rivera, A. S., Akanbi, M., O'Dwyer, L. C., & McHugh, M. (2020). Shift work and long work hours and their association with chronic health conditions: A systematic review of systematic reviews with meta-analyses. *PLoS One*, *15*(4), e0231037. <https://doi.org/10.1371/journal.pone.0231037>
- Roquelaure, Y., Garlantézec, R., Rousseau, V., Descatha, A., Evanoff, B., Mattioli, S., Goldberg, M., Zins, M., & Bodin, J. (2020). Carpal tunnel syndrome and exposure to work-related biomechanical stressors and chemicals: Findings from the Constances cohort. *PLoS One*, *15*(6), e0235051. <https://doi.org/10.1371/journal.pone.0235051>
- Rudkjoebing, L. A., Bungum, A. B., Flachs, E. M., Eller, N. H., Borritz, M., Aust, B., Rugulies, R., Rod, N. H., Biering, K., & Bonde, J. P. (2020). Work-related exposure to violence or threats and risk of mental disorders and symptoms: a systematic review and meta-analysis. *Scand J Work Environ Health*, *46*(4), 339-349. <https://doi.org/10.5271/sjweh.3877>
- Ryu, J. Y., Sunwoo, Y. E., Lee, S. Y., Lee, C. K., Kim, J. H., Lee, J. T., & Kim, D. H. (2015). Chronic Obstructive Pulmonary Disease (COPD) and Vapors, Gases, Dusts, or Fumes (VGDF): A Meta-analysis. *Copd*, *12*(4), 374-380. <https://doi.org/10.3109/15412555.2014.949000>
- Rönblad, T., Grönholm, E., Jonsson, J., Koranyi, I., Orellana, C., Kreshpaj, B., Chen, L., Stockfelt, L., & Bodin, T. (2019). Precarious employment and mental health: a systematic review and meta-analysis of longitudinal studies. *Scand J Work Environ Health*, *45*(5), 429-443. <https://doi.org/10.5271/sjweh.3797>
- Sadhra, S., Kurmi, O. P., Sadhra, S. S., Lam, K. B., & Ayres, J. G. (2017). Occupational COPD and job exposure matrices: a systematic review and meta-analysis. *Int J Chron Obstruct Pulmon Dis*, *12*, 725-734. <https://doi.org/10.2147/copd.S125980>
- Sara, J. D., Prasad, M., Eleid, M. F., Zhang, M., Widmer, R. J., & Lerman, A. (2018). Association Between Work-Related Stress and Coronary Heart Disease: A Review of Prospective Studies Through the Job Strain, Effort-Reward Balance, and Organizational Justice Models. *J Am Heart Assoc*, *7*(9). <https://doi.org/10.1161/jaha.117.008073>
- Saulle, R., Bernardi, M., Chiarini, M., Backhaus, I., & La Torre, G. (2018). Shift work, overweight and obesity in health professionals: a systematic review and meta-analysis. *Clin Ter*, *169*(4), e189-e197. <https://doi.org/10.7417/t.2018.2077>
- SBU. (2014). *Arbetsmiljöns betydelse för ryggproblem. En systematisk litteraturöversikt [Occupational Exposures and Back Disorders. A Systematic Review]* (SBU-rapport nr 227). Statens beredning för medicinsk och social utvärdering (SBU).
- SBU. (2015). *Arbetsmiljöns betydelse för hjärt-kärlsjukdom. En systematisk litteraturöversikt [Occupational Exposures and Cardiovascular Disease. A Systematic Review]* (SBU-rapport nr 240). Statens beredning för medicinsk och social utvärdering (SBU).
- SBU. (2017). *Arbetsmiljöns betydelse för hjärt-kärlsjukdom - Exponering för kemiska ämnen. En systematisk översikt och utvärdering av medicinska, sociala och etiska aspekter [Occupational Chemical Exposures and Cardiovascular Disease. A systematic review and assessment of the social, medical and ethical aspects]* (SBU-rapport nr 261). Statens beredning för medicinsk och social utvärdering (SBU).
- Schlünssen, V., Würtz, E., Hansen, M., Miller, M., Sigsgaard, T., & Omland, Ø. (2020). The impact on the aetiology of COPD, bronchitis and bronchiolitis. In J. Feary, H. Suojalehto, & P. Cullinan (Eds.), *Occupational and Environmental Lung Disease* (pp. 86–103). European Respiratory Society.
- Schram, B., Orr, R., Pope, R., Canetti, E., & Knapik, J. (2020). Risk factors for development of lower limb osteoarthritis in physically demanding occupations: A narrative umbrella review. *J Occup Health*, *62*(1), e12103. <https://doi.org/10.1002/1348-9585.12103>

- Seidler, A., Romero Starke, K., Freiberg, A., Hegewald, J., Nienhaus, A., & Bolm-Audorff, U. (2020). Dose-Response Relationship between Physical Workload and Specific Shoulder Diseases-A Systematic Review with Meta-Analysis. *Int J Environ Res Public Health*, *17*(4). <https://doi.org/10.3390/ijerph17041243>
- Sekhatha, M. M., Monyeki, K. D., & Sibuyi, M. E. (2016). Exposure to Agrochemicals and Cardiovascular Disease: A Review. *Int J Environ Res Public Health*, *13*(2), 229. <https://doi.org/10.3390/ijerph13020229>
- Shiri, R., & Falah-Hassani, K. (2015). Computer use and carpal tunnel syndrome: A meta-analysis. *J Neurol Sci*, *349*(1-2), 15-19. <https://doi.org/10.1016/j.jns.2014.12.037>
- Shrestha, N., Pedisic, Z., Neil-Sztramko, S., Kukkonen-Harjula, K. T., & Hermans, V. (2016). The Impact of Obesity in the Workplace: a Review of Contributing Factors, Consequences and Potential Solutions. *Curr Obes Rep*, *5*(3), 344-360. <https://doi.org/10.1007/s13679-016-0227-6>
- Sjögren, B., Bigert, C., & Gustavsson, P. (2020). The Nordic Expert group for criteria documentation of health risks from chemicals. Occupational chemical exposures and cardiovascular disease. In (Vol. 54(2)): Arbete och Hälsa, Gothenburg University.
- Skogstad, M., Johannessen, H. A., Tynes, T., Mehlum, I. S., Nordby, K. C., & Lie, A. (2016). Systematic review of the cardiovascular effects of occupational noise. *Occup Med (Lond)*, *66*(1), 10-16. <https://doi.org/10.1093/occmed/kqv148>
- Skröder, H., Pettersson, H., Albin, M., Gustavsson, P., Rylander, L., Norlén, F., & Selander, J. (2020). Occupational exposure to whole-body vibrations and pregnancy complications: a nationwide cohort study in Sweden. *Occup Environ Med*, *77*(10), 691-698. <https://doi.org/10.1136/oemed-2020-106519>
- Snyder, H. M., Carare, R. O., DeKosky, S. T., de Leon, M. J., Dykxhoorn, D., Gan, L., Gardner, R., Hinds, S. R., 2nd, Jaffee, M., Lamb, B. T., Landau, S., Manley, G., McKee, A., Perl, D., Schneider, J. A., Weiner, M., Wellington, C., Yaffe, K., Bain, L., Pacifico, A. M., & Carrillo, M. C. (2018). Military-related risk factors for dementia. *Alzheimers Dement*, *14*(12), 1651-1662. <https://doi.org/10.1016/j.jalz.2018.08.011>
- Solovieva, S., Lallukka, T., Virtanen, M., & Viikari-Juntura, E. (2013). Psychosocial factors at work, long work hours, and obesity: a systematic review. *Scand J Work Environ Health*, *39*(3), 241-258. <https://doi.org/10.5271/sjweh.3364>
- Soteriades, E. S., Smith, D. L., Tsismenakis, A. J., Baur, D. M., & Kales, S. N. (2011). Cardiovascular disease in US firefighters: a systematic review. *Cardiol Rev*, *19*(4), 202-215. <https://doi.org/10.1097/CRD.0b013e318215c105>
- Standards, S. C. G. f. O. (2014). Scientific Basis for Swedish Occupational Standards XXXIII: N-Methyl-2-pyrrolidone; Crystalline Silica, Quartz; Epichlorohydrin. *Arbete och Hälsa*, *48*(48), 25-76.
- Stevens, W. W., & Grammer, L. C., 3rd. (2015). Occupational rhinitis: an update. *Curr Allergy Asthma Rep*, *15*(1), 487. <https://doi.org/10.1007/s11882-014-0487-8>
- Sui, H., Sun, N., Zhan, L., Lu, X., Chen, T., & Mao, X. (2016). Association between Work-Related Stress and Risk for Type 2 Diabetes: A Systematic Review and Meta-Analysis of Prospective Cohort Studies. *PLoS One*, *11*(8), e0159978. <https://doi.org/10.1371/journal.pone.0159978>
- Sun, M., Feng, W., Wang, F., Li, P., Li, Z., Li, M., Tse, G., Vlaanderen, J., Vermeulen, R., & Tse, L. A. (2018). Meta-analysis on shift work and risks of specific obesity types. *Obes Rev*, *19*(1), 28-40. <https://doi.org/10.1111/obr.12621>
- Sun, Y., Nold, A., Glitsch, U., & Bochmann, F. (2019). Exposure-Response Relationship and Doubling Risk Doses-A Systematic Review of Occupational Workload and Osteoarthritis of the Hip. *Int J Environ Res Public Health*, *16*(19). <https://doi.org/10.3390/ijerph16193681>
- Sundaresan, A. S., Hirsch, A. G., Storm, M., Tan, B. K., Kennedy, T. L., Greene, J. S., Kern, R. C., & Schwartz, B. S. (2015). Occupational and environmental risk factors for chronic rhinosinusitis: a systematic review. *Int Forum Allergy Rhinol*, *5*(11), 996-1003. <https://doi.org/10.1002/alr.21573>
- Swain C.T.V., Pan F., Owen P.J., Schmidt H. & Belavy D.L. (2020) No consensus on causality of spine postures or physical exposure and low back pain: A systematic review of systematic reviews. *J Biomech*. 102:109312. doi: 10.1016/j.jbiomech.2019.08.006. PMID: 31451200
- Takahashi, N., & Hashizume, M. (2014). A systematic review of the influence of occupational organophosphate pesticides exposure on neurological impairment. *BMJ Open*, *4*(6), e004798. <https://doi.org/10.1136/bmjopen-2014-004798>
- Taskar, V., & Coultas, D. (2008). Exposures and idiopathic lung disease. *Semin Respir Crit Care Med*, *29*(6), 670-679. <https://doi.org/10.1055/s-0028-1101277>
- Taskar, V. S., & Coultas, D. B. (2006). Is idiopathic pulmonary fibrosis an environmental disease? *Proc Am Thorac Soc*, *3*(4), 293-298. <https://doi.org/10.1513/pats.200512-131TK>

- Taylor, A. N., Cullinan, P., Blanc, P., & Pickering, A. (2017). *Parkes' Occupational Lung Disorders* (4th ed.). CRC Press.
- Teixeira, L. R., Pega, F., Dzhambov, A. M., Bortkiewicz, A., da Silva, D. T. C., de Andrade, C. A. F., Gadzicka, E., Hadkhale, K., Iavicoli, S., Martínez-Silveira, M. S., Pawlaczyk-Łuszczynska, M., Rondinone, B. M., Siedlecka, J., Valenti, A., & Gagliardi, D. (2021). The effect of occupational exposure to noise on ischaemic heart disease, stroke and hypertension: A systematic review and meta-analysis from the WHO/ILO Joint Estimates of the Work-Related Burden of Disease and Injury. *Environ Int*, *154*, 106387. <https://doi.org/10.1016/j.envint.2021.106387>
- Then, F. S., Luck, T., Luppia, M., Arélin, K., Schroeter, M. L., Engel, C., Löffler, M., Thiery, J., Villringer, A., & Riedel-Heller, S. G. (2014). Association between mental demands at work and cognitive functioning in the general population - results of the health study of the Leipzig research center for civilization diseases (LIFE). *J Occup Med Toxicol*, *9*, 23. <https://doi.org/10.1186/1745-6673-9-23>
- Theorell, T., Hammarström, A., Aronsson, G., Träskman Bendz, L., Grape, T., Hogstedt, C., Marteinsdottir, I., Skoog, I., & Hall, C. (2015). A systematic review including meta-analysis of work environment and depressive symptoms. *BMC Public Health*, *15*, 738. <https://doi.org/10.1186/s12889-015-1954-4>
- Thiese, M. S., Lu, M. L., Merryweather, A., Tang, R., Ferguson, S. A., Malloy, E. J., Marras, W. S., Hegmann, K. T., & Kapellusch, J. (2020). Psychosocial Factors and Low Back Pain Outcomes in a Pooled Analysis of Low Back Pain Studies. *J Occup Environ Med*, *62*(10), 810-815. <https://doi.org/10.1097/jom.0000000000001941>
- Thomsen, J. F., Gerr, F., & Atroshi, I. (2008). Carpal tunnel syndrome and the use of computer mouse and keyboard: a systematic review. *BMC Musculoskelet Disord*, *9*, 134. <https://doi.org/10.1186/1471-2474-9-134>
- Tjalvin, G., Svanes, Ø., Bertelsen, R. J., Hollund, B. E., Aasen, T. B., Svanes, C., & Kirkeleit, J. (2018). Hypersensitivity pneumonitis in fish processing workers diagnosed by inhalation challenge. *ERJ Open Res*, *4*(4). <https://doi.org/10.1183/23120541.00071-2018>
- Toribio, R., Cruz, M. J., Morell, F., & Muñoz, X. (2012). Hypersensitivity pneumonitis related to medium-density fiberboard. *Arch Bronconeumol*, *48*(1), 29-31. <https://doi.org/10.1016/j.arbres.2011.04.006>
- Torquati, L., Mielke, G. I., Brown, W. J., Burton, N. W., & Kolbe-Alexander, T. L. (2019). Shift Work and Poor Mental Health: A Meta-Analysis of Longitudinal Studies. *Am J Public Health*, *109*(11), e13-e20. <https://doi.org/10.2105/ajph.2019.305278>
- Torquati, L., Mielke, G. I., Brown, W. J., & Kolbe-Alexander, T. (2018). Shift work and the risk of cardiovascular disease. A systematic review and meta-analysis including dose-response relationship. *Scand J Work Environ Health*, *44*(3), 229-238. <https://doi.org/10.5271/sjweh.3700>
- van der Molen, H. F., Foresti, C., Daams, J. G., Frings-Dresen, M. H. W., & Kuijjer, P. (2017). Work-related risk factors for specific shoulder disorders: a systematic review and meta-analysis. *Occup Environ Med*, *74*(10), 745-755. <https://doi.org/10.1136/oemed-2017-104339>
- van Rijn, R. M., Huisstede, B. M., Koes, B. W., & Burdorf, A. (2009). Associations between work-related factors and the carpal tunnel syndrome--a systematic review. *Scand J Work Environ Health*, *35*(1), 19-36. <https://doi.org/10.5271/sjweh.1306>
- van Uffelen, J. G., Wong, J., Chau, J. Y., van der Ploeg, H. P., Riphagen, I., Gilson, N. D., Burton, N. W., Healy, G. N., Thorp, A. A., Clark, B. K., Gardiner, P. A., Dunstan, D. W., Bauman, A., Owen, N., & Brown, W. J. (2010). Occupational sitting and health risks: a systematic review. *Am J Prev Med*, *39*(4), 379-388. <https://doi.org/10.1016/j.amepre.2010.05.024>
- Vandenplas, O., Hox, V., & Bernstein, D. (2020). Occupational Rhinitis. *J Allergy Clin Immunol Pract*, *8*(10), 3311-3321. <https://doi.org/10.1016/j.jaip.2020.06.047>
- Vandenplas, O., Wiszniewska, M., Raulf, M., de Blay, F., Gerth van Wijk, R., Moscato, G., Nemery, B., Pala, G., Quirce, S., Sastre, J., Schlünssen, V., Sigsgaard, T., Siracusa, A., Tarlo, S. M., van Kampen, V., Zock, J. P., & Walusiak-Skorupa, J. (2014). EAACI position paper: irritant-induced asthma. *Allergy*, *69*(9), 1141-1153. <https://doi.org/10.1111/all.12448>
- Verbeek, J., Mischke, C., Robinson, R., Ijaz, S., Kuijjer, P., Kievit, A., Ojajärvi, A., & Neuvonen, K. (2017). Occupational Exposure to Knee Loading and the Risk of Osteoarthritis of the Knee: A Systematic Review and a Dose-Response Meta-Analysis. *Saf Health Work*, *8*(2), 130-142. <https://doi.org/10.1016/j.shaw.2017.02.001>
- Verkuil, B., Atasayi, S., & Molendijk, M. L. (2015). Workplace Bullying and Mental Health: A Meta-Analysis on Cross-Sectional and Longitudinal Data. *PLoS One*, *10*(8), e0135225. <https://doi.org/10.1371/journal.pone.0135225>

- Virk, S. A., & Eslick, G. D. (2015). Occupational Exposure to Aluminum and Alzheimer Disease: A Meta-Analysis. *J Occup Environ Med*, 57(8), 893-896. <https://doi.org/10.1097/jom.0000000000000487>
- Virtanen, M., Ervasti, J., Head, J., Oksanen, T., Salo, P., Pentti, J., Kouvonen, A., Väänänen, A., Suominen, S., Koskenvuo, M., Vahtera, J., Elovainio, M., Zins, M., Goldberg, M., & Kivimäki, M. (2018). Lifestyle factors and risk of sickness absence from work: a multicohort study. *Lancet Public Health*, 3(11), e545-e554. [https://doi.org/10.1016/s2468-2667\(18\)30201-9](https://doi.org/10.1016/s2468-2667(18)30201-9)
- Virtanen, M., Jokela, M., Lallukka, T., Magnusson Hanson, L., Pentti, J., Nyberg, S. T., Alfredsson, L., Batty, G. D., Casini, A., Clays, E., DeBacquer, D., Ervasti, J., Fransson, E., Halonen, J. I., Head, J., Kittel, F., Knutsson, A., Leineweber, C., Nordin, M., Oksanen, T., Pietiläinen, O., Rahkonen, O., Salo, P., Singh-Manoux, A., Stenholm, S., Suominen, S. B., Theorell, T., Vahtera, J., Westerholm, P., Westerlund, H., & Kivimäki, M. (2020). Long working hours and change in body weight: analysis of individual-participant data from 19 cohort studies. *Int J Obes (Lond)*, 44(6), 1368-1375. <https://doi.org/10.1038/s41366-019-0480-3>
- Visser, A. E., D'Ovidio, F., Peters, S., Vermeulen, R. C., Beghi, E., Chiò, A., Veldink, J. H., Logroscino, G., Hardiman, O., & van den Berg, L. H. (2019). Multicentre, population-based, case-control study of particulates, combustion products and amyotrophic lateral sclerosis risk. *J Neurol Neurosurg Psychiatry*, 90(8), 854-860. <https://doi.org/10.1136/jnnp-2018-319779>
- Visser, A. E., Rooney, J. P. K., D'Ovidio, F., Westeneng, H. J., Vermeulen, R. C. H., Beghi, E., Chiò, A., Logroscino, G., Hardiman, O., Veldink, J. H., & van den Berg, L. H. (2018). Multicentre, cross-cultural, population-based, case-control study of physical activity as risk factor for amyotrophic lateral sclerosis. *J Neurol Neurosurg Psychiatry*, 89(8), 797-803. <https://doi.org/10.1136/jnnp-2017-317724>
- Vyas, M. V., Garg, A. X., Iansavichus, A. V., Costella, J., Donner, A., Laugsand, L. E., Janszky, I., Mrkobrada, M., Parraga, G., & Hackam, D. G. (2012). Shift work and vascular events: systematic review and meta-analysis. *Bmj*, 345, e4800. <https://doi.org/10.1136/bmj.e4800>
- Wagner, G. R. (1997). Asbestosis and silicosis. *Lancet (London, England)*, 349(9061), 1311-1315. [https://doi.org/10.1016/s0140-6736\(96\)07336-9](https://doi.org/10.1016/s0140-6736(96)07336-9)
- Walters, G. I., Trotter, S., Sinha, B., Richmond, Z., & Burge, P. S. (2017). Biopsy-proven hypersensitivity pneumonitis caused by a fluorocarbon waterproofing spray. *Occup Med (Lond)*, 67(4), 308-310. <https://doi.org/10.1093/occmed/kqx039>
- Wang, H., Sun, D., Wang, B., Gao, D., Zhou, Y., Wang, N., & Zhu, B. (2020). Association between noise exposure and diabetes: meta-analysis. *Environ Sci Pollut Res Int*, 27(29), 36085-36090. <https://doi.org/10.1007/s11356-020-09826-6>
- Wang, M. D., Little, J., Gomes, J., Cashman, N. R., & Krewski, D. (2017). Identification of risk factors associated with onset and progression of amyotrophic lateral sclerosis using systematic review and meta-analysis. *Neurotoxicology*, 61, 101-130. <https://doi.org/10.1016/j.neuro.2016.06.015>
- Wang, X., Perry, T. A., Arden, N., Chen, L., Parsons, C. M., Cooper, C., Gates, L., & Hunter, D. J. (2020). Occupational Risk in Knee Osteoarthritis: A Systematic Review and Meta-Analysis of Observational Studies. *Arthritis Care Res (Hoboken)*, 72(9), 1213-1223. <https://doi.org/10.1002/acr.24333>
- Wang, Z., Wei, X., Yang, J., Suo, J., Chen, J., Liu, X., & Zhao, X. (2016). Chronic exposure to aluminum and risk of Alzheimer's disease: A meta-analysis. *Neurosci Lett*, 610, 200-206. <https://doi.org/10.1016/j.neulet.2015.11.014>
- Westeneng, H. J., van Veenhuijzen, K., van der Spek, R. A., Peters, S., Visser, A. E., van Rheenen, W., Veldink, J. H., & van den Berg, L. H. (2021). Associations between lifestyle and amyotrophic lateral sclerosis stratified by C9orf72 genotype: a longitudinal, population-based, case-control study. *Lancet Neurol*, 20(5), 373-384. [https://doi.org/10.1016/s1474-4422\(21\)00042-9](https://doi.org/10.1016/s1474-4422(21)00042-9)
- Wong, K., Chan, A. H. S., & Ngan, S. C. (2019). The Effect of Long Working Hours and Overtime on Occupational Health: A Meta-Analysis of Evidence from 1998 to 2018. *Int J Environ Res Public Health*, 16(12). <https://doi.org/10.3390/ijerph16122102>
- Wærsted, M., Koch, M., & Veiersted, K. B. (2020). Work above shoulder level and shoulder complaints: a systematic review. *Int Arch Occup Environ Health*, 93(8), 925-954. <https://doi.org/10.1007/s00420-020-01551-4>
- Yassi, A., & Lockhart, K. (2013). Work-relatedness of low back pain in nursing personnel: a systematic review. *Int J Occup Environ Health*, 19(3), 223-244. <https://doi.org/10.1179/2049396713y.0000000027>



- You, D., Smith, A. H., & Rempel, D. (2014). Meta-analysis: association between wrist posture and carpal tunnel syndrome among workers. *Saf Health Work, 5*(1), 27-31. <https://doi.org/10.1016/j.shaw.2014.01.003>
- Zaganas, I., Kapetanaki, S., Mastorodemos, V., Kanavouras, K., Colosio, C., Wilks, M. F., & Tsatsakis, A. M. (2013). Linking pesticide exposure and dementia: what is the evidence? *Toxicology, 307*, 3-11. <https://doi.org/10.1016/j.tox.2013.02.002>
- Zhang, H., Wang, Q., He, S., Wu, K., Ren, M., Dong, H., Di, J., Yu, Z., & Huang, C. (2020a). Ambient air pollution and gestational diabetes mellitus: A review of evidence from biological mechanisms to population epidemiology. *Sci Total Environ, 719*, 137349. <https://doi.org/10.1016/j.scitotenv.2020.137349>
- Zhang, Q., Chair, S. Y., Lo, S. H. S., Chau, J. P., Schwade, M., & Zhao, X. (2020b). Association between shift work and obesity among nurses: A systematic review and meta-analysis. *Int J Nurs Stud, 112*, 103757. <https://doi.org/10.1016/j.ijnurstu.2020.103757>
- Zhu, Y., Liu, J., Jiang, H., Brown, T. J., Tian, Q., Yang, Y., Wang, C., Xu, H., Liu, J., Gan, Y., & Lu, Z. (2020). Are long working hours associated with weight-related outcomes? A meta-analysis of observational studies. *Obes Rev, 21*(3), e12977. <https://doi.org/10.1111/obr.12977>
